1 **The diversity, structure and function of heritable adaptive**  
2 **immunity sequences in the *Aedes aegypti* genome**

3  
4 Zachary J. Whitfield<sup>1\*</sup>, Patrick T. Dolan<sup>1,2\*</sup>, Mark Kunitomi<sup>1\*#</sup>, Michel Tassetto<sup>1</sup>,  
5 Matthew G. Seetin<sup>3</sup>, Steve Oh<sup>3</sup>, Cheryl Heiner<sup>3</sup>, Ellen Paxinos<sup>3</sup>, and Raul  
6 Andino<sup>1</sup>

7  
8 <sup>1</sup> Department of Microbiology and Immunology, University of California, 600 16<sup>th</sup>  
9 Street, GH-S572, UCSF Box 2280, San Francisco, California 94143-2280, USA.

10 <sup>2</sup> Department of Biology, Stanford University, E200 Clark Center, 318 Campus  
11 Drive, Stanford, CA 94305

12 <sup>3</sup> Pacific Biosciences, 1305 O'Brien Drive, Menlo Park, California, 94025, USA.

13 \*These authors contributed equally to this work

14 # Current address: IBM Almaden Research Center, 650 Harry Road, San Jose,  
15 California, 95120-6099, USA.

16 To whom correspondence should be addressed. E-mail: [raul.andino@ucsf.edu](mailto:raul.andino@ucsf.edu)

17

18 **Abstract**

19       The *Aedes aegypti* mosquito is a major vector for arboviruses including  
20 dengue, chikungunya and Zika virus. Combating the spread of these viruses  
21 requires a more complete understanding of the mosquito immune system.  
22 Recent studies have implicated genomic endogenous viral elements (EVEs)  
23 derived from non-retroviral RNA viruses in insect immunity. Because these  
24 elements are inserted into repetitive regions of the mosquito genome, their large-  
25 scale structure and organization with respect to other genomic elements has  
26 been difficult to resolve with short-read sequencing. To better define the origin,  
27 diversity and biological role of EVEs, we employed single-molecule, real-time  
28 sequencing technology to generate a high quality, long-read assembly of the *Ae.*  
29 *aegypti*-derived Aag2 cell line genome. We leverage the quality and contiguity of  
30 this assembly to characterize the diversity and genomic context of EVEs in the  
31 genome of this important model system. We find that EVEs in the Aag2 genome  
32 are acquired through recombination by LTR retrotransposons, and organize into  
33 larger loci (>50kbp) characterized by high LTR density. These EVE containing  
34 loci are associated with increased transcription factor binding site density and  
35 increased production of anti-genomic piRNAs. We also detected piRNA  
36 processing corresponding to on-going viral infection. This global view of EVEs  
37 and piRNA responses demonstrates the ubiquity and diversity of these heritable  
38 elements that define small-RNA mediated antiviral immunity in mosquitoes.

39

40

41 **INTRODUCTION (700 words currently)**

42 Arboviruses such as Dengue virus (DENV), Chikungunya virus (CHIKV),  
43 and the newly emerging Zika virus, cause widespread and debilitating disease  
44 across the globe (Bhatt et al., 2013). The primary vector of these viruses, *Aedes*  
45 *aegypti*, has a global tropical/subtropical distribution (Kraemer et al., 2015)  
46 creating distinct, geographically isolated populations. The genetic diversity of  
47 *Aedes* populations has resulted in differential competence for vectoring virus  
48 (Bennett et al., 2002). Differences in the insect immune system are critical factors  
49 in determining competence (Kramer, 2016; Kramer & Ciota, 2015) and recent  
50 studies suggest that virus-derived sequences in the mosquito genome may  
51 contribute to resistance (Kunitomi et al., submitted). Comparative genomics may  
52 explain these differences in vector competence between *Ae. aegypti* populations,  
53 however the repetitive nature of the mosquito genome has been refractory to  
54 assembly.

55 The genomic acquisition of viral sequences represents an important  
56 source of genomic diversity and immune innovation in eukaryotes (Aswad &  
57 Katzourakis, 2012; Chuong, Elde, & Feschotte, 2016; Feschotte & Gilbert, 2012;  
58 Katzourakis & Gifford, 2010). Most virus-derived sequences are retroviral and are  
59 acquired through the process of proviral genomic integration. Many examples of  
60 acquired retroviral genes evolving new functions within the host have been  
61 described (Chuong, et al., 2016). In addition, many sequences originating from  
62 non-retroviruses have integrated into the genomes of their eukaryotic hosts.

63 These non-retroviral endogenous viral elements (EVEs) are thought to be  
64 acquired through the action of endogenous retrotransposon-derived reverse  
65 transcriptases (Belyi, Levine, & Skalka, 2010a, 2010b; Gilbert & Feschotte, 2010;  
66 Horie et al., 2010; Katzourakis & Gifford, 2010; Taylor, Leach, & Bruenn, 2010).  
67 Consistent with this model, DNA derived from RNA viruses is produced in  
68 persistently infected *Drosophila* cell lines (Goic et al., 2013) and in infected  
69 *Aedes albopictus* mosquitoes (and multiple mosquito-derived cell culture lines).  
70 Synthesis of this viral DNA (vDNA) depends on the activity of endogenous  
71 reverse transcriptases (Goic et al., 2016; Goic, et al., 2013). Furthermore,  
72 sequencing of viral DNA isolated from *Drosophila* cell lines (Goic, et al., 2013)  
73 has demonstrated the formation of recombinants between viral DNA sequences  
74 and transposable elements.

75 Insects rely on RNAi-based immune defenses, wherein viral dsRNA  
76 intermediates are recognized and processed through a dicer- and argonaute-  
77 mediated pathway, ultimately leading to cleavage of viral RNA and protection  
78 from infection (Mongelli & Saleh, 2016). Mosquitoes employ an additional RNAi  
79 pathway which was previously associated primarily with TE silencing in  
80 *Drosophila*, as an antiviral defense system (Hess et al., 2011; Miesen, Joosten, &  
81 van Rij, 2016) (Kunitomi et al, submitted). The Piwi-interacting RNA (piRNA)  
82 pathway, mediated by Piwi proteins and associated 24-28nt small RNAs,  
83 involves the cleavage and processing of endogenous TE genomic antisense  
84 transcripts into small RNAs. These small RNAs target TE transcripts with



85 appropriate sequence identity, yielding sense piRNAs that, in turn, drive further  
86 antisense transcript processing.

87       Transcripts derived from genomic EVE sequences can be processed into  
88 piRNAs, and a set of proteins responsible for their processing and maturation  
89 has been identified (Arensburger, Hice, Wright, Craig, & Atkinson, 2011; Goic, et  
90 al., 2016; Miesen, Girardi, & van Rij, 2015; Miesen, Ivens, Buck, & van Rij, 2016;  
91 Miesen, Joosten, et al., 2016; Varjak et al., 2017). Genomic EVE sequences  
92 confer resistance to viruses that encode identical sequences, in association with  
93 an accumulation of EVE-specific piRNAs (Kunitomi et al, submitted) (Miesen,  
94 Joosten, et al., 2016). Thus, the library of acquired viral sequences in the  
95 mosquito genome not only represents a record of the natural history of infection  
96 in this important vector species, but also a potential reservoir of immune memory.  
97 Understanding the acquisition of circulating viruses into these heritable genomic  
98 loci has major implications for mosquito immunity and disease transmission.  
99 Toward that end, recent publications have examined Flavivirus EVEs in both  
100 wild-caught mosquitoes and mosquito-derived cell lines (Suzuki et al., 2017) and  
101 nonretroviral EVEs across currently available genomic assemblies (Palatini et al.,  
102 2017). These studies have demonstrated that EVEs integrate in association with  
103 LTR sequences and integrate into genomic loci known as piClusters. However,  
104 because of difficulties resolving these genomic regions the full diversity of EVE  
105 sequences and their relationship to piRNAs derived from these sequences have  
106 not been yet described in a systematic way.

107           Here, we report the first such study, which examines the structure and  
108 genomic context of the collection of non-retroviral EVEs present in the *Aedes*  
109 *aegypti*-derived Aag2 cell line genome. Using an improved genomic assembly  
110 from long-read sequencing as the basis of our analysis, we characterize the  
111 structure and composition of EVE-containing loci across the entire genome.  
112 Additionally, we compare these data to small RNA sequencing data from Aag2  
113 cells to assess the transcription and processing of small RNAs originating from  
114 these loci to understand the form and potential antiviral function of these  
115 important loci.

## 116 **RESULTS**

### 117 **Sequencing and Assembly of the Aag2 Genome**

118           Current assemblies of the *Ae. aegypti* genome are based on two  
119 sequencing strategies: one produced with the Illumina sequencing platform  
120 (hereto referred to as 'UCB') (Vicoso & Bachtrog, 2015) and one based on  
121 conventional Sanger sequencing (hereto referred to as 'LVP') (Nene et al., 2007).  
122 In both instances, the Liverpool strain of *Ae. aegypti* was sequenced (Table 1). A  
123 more recent study used Hi-C to further organize the Sanger-based *Ae. aegypti*  
124 assembly into chromosome level scaffolds (Dudchenko et al., 2017). Due to the  
125 highly repetitive nature of the *Ae. aegypti* genome and EVEs' tendency to cluster  
126 with transposable elements within such repetitive regions, many EVEs are likely  
127 to be missing from the current *Ae. aegypti* assemblies, which are based on  
128 relatively short read lengths (Nene, et al., 2007; Vicoso & Bachtrog, 2015).  
129 Assessing the comprehensive genome-wide diversity and genomic context of

130 EVE sequences therefore requires an improved genomic assembly. To this end,  
131 we employed single-molecule, real-time sequence technology (Pacific  
132 Biosystems) to generate a long read assembly of the genome of the cell line  
133 Aag2.

134 We achieved approximately 76-fold coverage of the *Ae. aegypti*-based  
135 Aag2 genome using the Single Molecule Real Time (SMRT) sequencing platform  
136 (P6/C4 chemistry) to shotgun sequence 116 SMRT cells generating 92.7 GB of  
137 sequencing data with an average read length of 15.5 kb. We used Falcon and  
138 Quiver to generate a *de novo* 1.7 Gbp assembly with a contig N50 of ~1.4 Mbp.  
139 Our draft assembly improves upon previous *Aedes* assemblies as measured by  
140 N50, L50, and by contig number (Table 1 and Figure 1a). A majority of the Aag2  
141 assembly sequence is found on contigs 10-100x longer than previous  
142 assemblies. This increased contiguity allows the mapping of numerous contigs  
143 from the initial LVP assembly to single Aag2 contigs (SI Figure 1), and makes for  
144 an overall more ordered genome assembly.

145

#### 146 **Repetitive nature of the Aag2 genome**

147 The genome of *Ae. aegypti* was previously shown to contain high  
148 proportions of repeat-DNA (Nene, et al., 2007). The *Ae. aegypti*-derived Aag2  
149 genome is no different, and is comprised of almost 55% repeat sequence (Table  
150 1 and Table 2). Our sequencing strategy allows more repeats to be sequenced  
151 within a single read, and therefore better reflects the structure and organization  
152 of these repetitive elements. Direct alignment of contigs in the Aag2 assembly

153 and those of previous *Ae. aegypti* assemblies reveal resolved rearrangements  
154 and distinct repeated regions that were collapsed into single sequences in the  
155 previous assemblies (Figure 1b and SI Figure 1). These regions can span 10-  
156 20kb (uncollapsed), illustrating the need for long read lengths to properly order  
157 the vast number of repetitive regions in the *Ae. aegypti* genome. Of these  
158 repetitive regions, over 75% are made up of transposon-derived sequence (Table  
159 2).

160

### 161 **Identification of EVEs in the Aag2 genome**

162 Given their propensity to integrate into long, repetitive TE clusters (Figure  
163 3c, 4b)(Parrish et al., 2015), our understanding of the EVE composition and  
164 structure has been limited. Our improved, long-read assembly can better define  
165 the complete set of EVEs contained within the Aag2 genome, hereby called the  
166 “EVEome”. Using a BLASTx-based approach, EVEs were identified with respect  
167 to each virus’ protein coding/(+)-sense strand (see Methods). We identified a  
168 total of 472 EVEs in our Aag2 genome assembly. These EVEs represented at  
169 least 8 annotated viral families, but were dominated by sequences derived from  
170 Rhabdoviridae, Flaviviridae, and Chuviridae. The identified EVEs covered  
171 338,251 bp and ranged from 50 to 2,520 bp length with a median length of 620  
172 bp (Figure 2a and b).

173 To determine whether any region of the virus genome is more frequently  
174 acquired, EVEs were mapped onto the viral ORFs from which they derive. This  
175 analysis revealed asymmetric incorporation of certain viral ORFs (Figure 2c).

176 *Flaviviridae*-derived EVEs (Figure 2c, i) primarily mapped toward the 5' end of  
177 the single Flaviviral ORF, leaving a relative dearth of EVEs at the 3' end. EVEs  
178 deriving from *Rhabdoviridae* primarily originate from the Nucleoprotein (N) and  
179 Glycoprotein (G) coding sequences, with only a few originating from the RNA-  
180 dependent RNA polymerase (L) (Figure 2c, i). The lack of EVEs mapping to the  
181 polymerase may be the result of RNA expression levels, with L being the least  
182 expressed gene (Conzelmann, 1998), suggesting that the template for cDNA  
183 synthesis is viral mRNA. The lack of EVEs originating from the Phosphoprotein  
184 (P) or Matrix protein (M) is more difficult to explain, potentially reflecting the  
185 availability of the RNA template for recombination, or deleterious effects  
186 associated with acquisition of these sequences. Interestingly, EVEs derived from  
187 Chuviridae primarily map to the ORF of the Glycoprotein. Given the diverse  
188 Chuviridae genome organization (which occur as unsegmented, bi-segmented,  
189 and possibly circularized negative-sense genomes)(Li et al., 2015), this pattern  
190 could also be the result of mRNA abundance, or other mechanistic peculiarities  
191 of Chuviridae interaction with EVE acquisition machinery (see below). Within  
192 each viral ORF, there is no obvious preference for EVEs from a specific location.

193

#### 194 **Comparison of EVEs in *Ae. aegypti* and *Aedes albopictus* genomes**

195 If EVEs serve as a representative record of viral infection over time, we  
196 hypothesized that EVEs present in two different species of mosquito would also  
197 differ (particularly given the relatively rare occurrence of genome fixation)  
198 (Holmes, 2011; Katzourakis & Gifford, 2010). The *Ae. aegypti* and *Ae. albopictus*

199 species of mosquito occupy distinct (yet overlapping) regions around the globe  
200 (Kraemer, et al., 2015) and have, therefore, faced different viral challenges over  
201 time. While the EVEs present in the Aag2 and LVP *Ae. aegypti*-based genomes  
202 correspond well, *Ae. aegypti* and *Ae. albopictus* do not share any specific EVEs.  
203 However, exploring the Flaviviridae family of viruses in greater detail, the viral  
204 species from which these EVEs are derived do primarily overlap (Figure 2d).  
205 However, the relative abundance of EVEs derived from various viral species in  
206 *Ae. aegypti* and *Ae. albopictus* differs. The lack of specific EVEs in common  
207 between the mosquito genomes indicates EVE acquisition by *Ae. aegypti* and  
208 *Ae. albopictus* occurred post-speciation, an important factor when considering  
209 any differences in vector competence between these two species. However, it is  
210 also important to note that these species are estimated to have diverged around  
211 71 million years ago (Chen et al., 2015), and so only under very strong and  
212 consistent positive selection could EVEs integrated pre-speciation have been  
213 preserved.

214

### 215 **Insights into the mechanism of EVE integration**

216 Transposable elements (TEs) provide an important source of genomic  
217 variation that drives evolution by modifying gene regulation and genome  
218 organization, and through the acquisition of non-retroviral EVE sequences  
219 (Gifford, Pfaff, & Macfarlan, 2013; Thompson, Macfarlan, & Lorincz, 2016).  
220 Because of this relationship between transposable elements and EVE integration  
221 (Feschotte & Gilbert, 2012; Honda & Tomonaga, 2016; Miesen, Joosten, et al.,

222 2016), and because our assembly is particularly suited for repeat identification  
223 and analysis, we explored the organization of TEs, specifically focusing on those  
224 proximal to EVE sequences.

225 The TEs in the Aag2 genome are derived from several different families  
226 (Fig 3a, S1 Fig). Kimura distribution analysis of TEs in the Aag2 genome can be  
227 used to 'date' the relative age of specific elements in the genome (Figure 3b)  
228 (Kimura, 1980). The distributions of Kimura scores for TEs in our assembly  
229 indicates relatively recent expansions of TEs, particularly LINE, LTR, and MITEs  
230 elements (Figure 3b; low Kimura scores indicate TEs that are closer to the  
231 element's consensus sequence, while higher scores indicated more diverged TE  
232 sequences).

233 To determine whether a particular transposable element type is  
234 responsible for EVE integration, we identified TEs whose position directly  
235 overlaps EVE sequences (as called by RepeatMasker and BLASTX  
236 respectively). This approach identifies mobile elements most likely responsible  
237 for genomic integration of non-retroviral virus sequence. In line with observations  
238 in *Ae. albopictus* (Chen, et al., 2015), TEs overlapping EVE sequences are  
239 greatly enriched for LTR retrotransposons (S2 Fig (i); p-value <  $3 \times 10^{-60}$ ). A  
240 similar pattern was observed when classifying the nearest upstream and  
241 downstream, non-overlapping TE sequences around each EVE (Figure 3c(i)).  
242 These results further implicate LTR retrotransposons in the acquisition of EVEs  
243 and indicate that the typical integration sites are composed of clusters of similar  
244 LTR retrotransposons.

245 Strikingly, 543 out of 614 LTRs shared the same polarity as their nearest-  
246 neighbor EVE (i.e. both TE and EVE elements are located on the same genomic  
247 DNA strand). These 543 LTRs made up the vast majority of all TEs with the  
248 same polarity as their nearest EVE (543/746; Figure 3c(i); p-value =  $1.09 \times 10^{-252}$   
249 by one-sided binomial test). This bias is consistent with a copy-choice  
250 mechanism of recombination between LTR retrotransposon sequence and viral  
251 RNA (or viral mRNA) leading to EVE integration, as previously proposed (Cotton,  
252 Steinbiss, Yokoi, Tsai, & Kikuchi, 2016; Geuking et al., 2009). Our analysis of  
253 transposons in the Aag2 genome shows LTR-retrotransposons display less  
254 sequence diversity (by Kimura Divergence score; Figure 3b), indicating that they  
255 are currently (or were recently) actively replicating in the Aag2 cell line.  
256 Consistent with this idea, LTR-retrotransposon transcripts and proteins are  
257 readily detected in Aag2 cells (Maringer et al., 2017). These data are consistent  
258 with LTR-retrotransposons being responsible for the acquisition of the majority of  
259 EVEs observed in the *Ae. aegypti*-derived Aag2 genome.

260 Within the LTR retrotransposon family, both Ty3/gypsy and Pao Bel TEs  
261 are enriched surrounding EVEs (Figure 3c iv,v). Again, this enrichment for  
262 Ty3/gypsy and Pao Bel elements near EVE loci is strongest when the EVE and  
263 TE are in the same orientation (p-value =  $6.90 \times 10^{-29}$  and  $1.71 \times 10^{-3}$   
264 respectively). The drastic bias in associated transposons based on directionality  
265 is not observed for other TE categories (Figure 3c, iii, vi). These data support  
266 Ty3/gypsy (and to a lesser extent Pao Bel) as the primary transposon type  
267 facilitating EVE genomic integration in the Aag2 cell line. Interestingly, an



268 association between LTR Ty3/gypsy elements and integrated viral sequence has  
269 also been observed previously in plants (Lee, Nolan, Watson, & Tristem, 2013;  
270 Stagin et al., 2007), suggesting a conserved mechanism for the acquisition of  
271 invading virus sequences and generation of EVEs.

272 EVE-proximal TEs of the Ty3/gypsy and Pao Bel families can be further  
273 partitioned into individual elements. Of these, many specific elements were  
274 enriched for being the nearest TE to an EVE (Figure 3c(iv, v)). Interestingly,  
275 EVEs derived from different virus families show different patterns of enrichment  
276 for nearby TEs (Figure 3d). Although Flaviviridae- and Rhabdoviridae-derived  
277 EVEs show strong enrichment for Ty3/gypsy transposable elements, Chuviridae-  
278 derived EVEs are associated with Pao Bel elements.

279

### 280 **EVEs associate with piClusters.**

281 The strong enrichment for multiple LTRs around EVEs (Fig 3c, S2 Fig) led  
282 us to examine the genomic context of EVE-TE integration sites in the genome.  
283 The large contig sizes associated with our long-read sequencing approach allow  
284 us to assess the large-scale spatial distribution of TEs and EVEs in the genome.  
285 Strikingly, we identified numerous loci where many EVE sequences overlapped  
286 with large regions of increased LTR density, some larger than 50kbp in length  
287 (Figure 4a). In some cases, these large loci are so densely packed with a single  
288 LTR they effectively “crowd out” any other repetitive elements (Figure 4b). Within  
289 these loci, EVE sequences are interspersed with TE fragments in unidirectional  
290 orientations (Figure 4c). They contain large numbers of EVEs derived from

291 different viral families (Figure 4c-e) suggesting that these regions occasionally  
292 capture new TE-virus hybrids.

293         The organization of these loci is similar to that of piClusters (Yamanaka,  
294 Siomi, & Siomi, 2014): piRNA-producing loci in the genome that result from the  
295 accumulation of TE fragments (due to non-random LTR integrase-directed  
296 integration)(Lesbats, Engelman, & Cherepanov, 2016). To assess the ability of  
297 these loci to produce piRNAs, we performed small RNA sequencing, employing a  
298 procedure to enrich for *bona fide* piRNAs. Indeed, we found that these loci  
299 produce a large number of piRNAs in a predominantly anti-sense orientation,  
300 consistent with the transcription of piClusters (Czech & Hannon, 2016;  
301 Yamanaka, et al., 2014).

302         We then used bioinformatic prediction to identify putative piClusters in the  
303 genome based upon piRNA mapping density. This analysis identified 469 piRNA-  
304 encoding loci (piClusters) using proTRAC (Rosenkranz, Rudloff, Bastuck,  
305 Ketting, & Zischler, 2015; Rosenkranz & Zischler, 2012), accounting for  
306 5,774,304 bp (0.335%) of the genome. Depending on the mapping algorithm  
307 used, between 63% (bowtie) and 77% (sRNAmapper.pl, see Methods) of beta-  
308 eliminated small RNAs from Aag2 cells mapped to these loci. Of the identified  
309 piClusters, 65 (14.1%) have EVE sequences associated with them and 64 of  
310 these piCluster-resident EVE sequences act as the template for piRNAs. Of the  
311 472 EVEs identified, 256 (66.7%) or 280,475 bp of the 411,239 EVE bp mapped  
312 to piClusters (68.2%, Fisher's test  $p < 2.2e-16$ , OR=203.42). Furthermore, a vast  
313 majority of piRNAs which map to EVEs are anti-sense to the coding sequence of

314 the corresponding virus (544,429/547,014; 99.5%), meaning that majority of  
315 piRNAs produced from genomic EVEs are potentially antiviral.

316 To examine whether piCluster-resident EVEs are under selection we  
317 examined the relative transcription of piClusters throughout the genome.  
318 piClusters that contain EVEs tend to produce more piRNAs (Fig 4d,e) The  
319 increased piRNA production at EVE-containing loci, is consistent with the  
320 observation that piClusters with EVEs exhibit higher transcription factor binding  
321 site density (Fig 4f). GATA4, SOX9 and RFX transcription factor binding sites are  
322 all enriched near EVE-containing piClusters ( $p < 2E-16$ , Wilcox rank-sum test).  
323 These data together suggest that selection acts at the level of EVE-specific  
324 piRNA production.

325

### 326 **piRNA abundance reflects the cellular immune state**

327 EVEs, in combination with their associate piRNAs, make up a reservoir of  
328 small RNA immune memory. Notably, in the Aag2 cell line, piRNA production  
329 from EVEs derived from a given viral family does not completely correlate with  
330 genomic abundance of those EVEs, suggesting that the antiviral potential of the  
331 EVEome against a given viral family depends on the amount of viral genetic  
332 information stored in the host genome, the transcriptional activity of individual  
333 piClusters and the sequence identity of the resulting piRNAs to circulating viral  
334 challenges (Figure 5a,b).

335 To examine the potential antiviral activity of piRNAs that originate from  
336 genomic EVEs, we mapped the same piRNA libraries (allowing for up to 3

337 mismatches) to contemporary viral genomes from which EVEs were expected to  
338 have derived (Figure 5d, S5 Fig). Aag2 cells are known to be persistently  
339 infected with cell-fusing agent virus (CFAV; *flaviviridae*), and were recently  
340 shown to also be persistently infected with Phasi Charoen-like virus (PCLV;  
341 *bunyaviridae*) (Maringer, et al., 2017) and these viruses, therefore, constitute  
342 potential substrates for recognition by EVE-derived piRNAs and subsequent  
343 processing. EVE-derived anti-genomic piRNAs (Figure 5c) only mapped to a  
344 single site on the PCLV nucleocapsid. However, we identified numerous sense  
345 piRNAs derived from PCLV, including a prominent peak which is offset from the  
346 EVE-derived anti-sense piRNA binding site by 10bps (Figure 5d,e). This pattern  
347 is consistent with EVE-derived piRNAs being funneled through canonical  
348 processing by the ping-pong amplification mechanism, being successfully loaded  
349 into the Piwi machinery and subsequently cleaving the viral mRNA. A similar  
350 pattern was observed for CFAV (Kunitomi, et al, submitted). Mapping of piRNAs  
351 to other viruses from which EVEs derived do not reveal this ‘response’ sense  
352 piRNA peak, presumably because those viruses are not currently replicating in  
353 the cells (S5 Fig). These observations indicate that an organism’s EVEome  
354 produces piRNAs capable of recognizing viruses and initiating an active  
355 response.  
356

357 **DISCUSSION**

358

359           A solid foundation with which to study the genetic factors contributing to  
360 vector competence is of utmost importance as arboviruses become an increasing  
361 burden globally. *In vivo* studies of mosquito immunity are a valuable but  
362 challenging approach to understanding arboviral life cycles. With this in mind, we  
363 generated a long-read assembly of the *Aedes aegypti* cell line, Aag2. With this  
364 highly contiguous assembly, we then identified nearly the entire set of  
365 endogenous viral elements and their surrounding genomic context in the Aag2  
366 cell line at a genome-wide scale. The Aag2 cell line is an important model system  
367 for the characterization of arboviral replication in mosquito hosts. Considering the  
368 potential impact of EVE sequences and their associated piRNAs on viral  
369 infection, understanding the diversity of EVEs in commonly used cell lines is  
370 especially important.

371           Surveying the genome-wide collection of EVEs in the Aag2 genome  
372 provides not only a view of the historical interactions between host and virus, but  
373 also the repertoire of acquired sequences that define the piRNA-based immune  
374 system of this important model system. Our analysis refines our understanding of  
375 EVEs in the *Ae. aegypti* genome, their relationship to transposable elements, and  
376 the potential breadth of antiviral protection they provide. We propose that a  
377 mosquito's EVEome, together with the piRNA system, represents a potentially  
378 long-lasting branch of its RNAi anti-viral defense system. Although all mosquito  
379 species share the same basic RNAi-based immune system, the differences in the

380 EVEome of a given species, subpopulation, or individual, such as those  
381 observed between *Ae. aegypti* and *Ae. albopictus* (Figure 2a), may represent a  
382 factor contributing to inherent differences in vector competence across many  
383 different scales. Indeed, the EVEome of wild mosquito populations appears to be  
384 in rapid flux (Varjak, et al., 2017).

385         The presence of piRNA producing EVEs in the *Ae. aegypti* genome is  
386 reminiscent of the CRISPR system in bacteria. Both take advantage of the  
387 invading pathogen's genetic material to create small RNAs capable of restricting  
388 an invading virus' replication. Furthermore, both integrate into the host's  
389 genome, potentially providing protection against infection across generations.  
390 Although the conservation of this pathway across Eukarya is not yet clear, recent  
391 publications have highlighted the integration of genetic material from non-  
392 retroviral RNA viruses into the genome of many different host species during  
393 infection. The antiviral activity of these sequences has not been established,  
394 however, a subset of EVEs found in mammalian systems seem to be under  
395 purifying selection, suggesting some potential benefit to the host (Horie, et al.,  
396 2010). In contrast to the evolutionary repurposing of retroviral sequences, the  
397 direct integration, transcription and processing of EVE sequences into antiviral  
398 small RNAs constitutes a mechanism by which these acquired sequences can be  
399 rapidly repurposed for host immune purposes.

400         Template switching during reverse transcription has previously been  
401 proposed to play a role in creating transposon-virus hybrids which integrate into  
402 the host genome to form EVEs (Cotton, et al., 2016; Geuking, et al., 2009). The

403 apparent family-level specificity observed between Pao Bel TEs and Chuviridae-  
404 derived sequences and between Ty3/gypsy TEs and Flaviviridae and  
405 Rhabdoviridae sequences is interesting in this respect (Figure 3d). This could  
406 have occurred by chance, or may hint at an even deeper level of specificity  
407 directing capture of viral sequences by LTRs. Possibly these TEs and viruses  
408 share increased sequence homology leading to more frequent template switching  
409 (Delviks-Frankenberry et al., 2011), or replicate in a similar subcellular location. It  
410 is also possible that LTR/EVE pairs were selected for and maintained after EVE  
411 integration into the mosquito genome. Suzuki et al. note that in different strains of  
412 *Ae. albopictus*, the Flavivirus-derived EVEs are conserved, but their flanking  
413 regions can be quite distinct (Suzuki, et al., 2017). As the authors noted, this  
414 hints at an evolutionary role for the EVEs themselves, but not necessarily the  
415 specific surrounding regions. Given the difference in piRNA production among  
416 piClusters with EVEs and without (Figure 4d,e), selection may only act at the  
417 level of piRNA production, rather than the specific TE elements.

418         Uncovering the genomic context of EVEs highlights the potential for the  
419 piRNA system to shape the mosquito immune system. It also provides a  
420 foundation for future investigations into EVE function. Comparative genomic  
421 approaches that incorporate long-read sequencing to understand the diversity of  
422 the EVEome across populations will allow us to better understand the forces that  
423 underlie the epidemiology and population dynamics of arboviruses. Moreover,  
424 the potential to manipulate this heritable, anti-viral immune system could present

425 opportunities for epidemiological interventions in natural settings, or as a genetic  
426 system to understand the insect immune system in the laboratory.

427

428

429 **Acknowledgements**

430 We thank Dr. Kevin M. Dalton for helpful discussion and code for the analysis.

431



## 432 **MATERIALS AND METHODS**

### 433 **Cells culture**

434 *Aedes aegypti* Aag2 (Lan & Fallon, 1990; Peleg, 1968) cells were cultured  
435 at 28 °C without CO<sub>2</sub> in Schneider's *Drosophila* medium (GIBCO-Invitrogen),  
436 supplemented with 10% heat-inactivated fetal bovine serum (FBS), 1X non-  
437 essential amino acids (NEAA, UCSF Cell Culture Facility, 100X stock is 0.1 μM  
438 filtered, 10 mM each of Glycine, L-Alanine, L-Asparagine, L-Aspartic acid, L-  
439 Glutamic Acid, L-Proline, and L-Serine in de-ionized water), and 1X Penicillin-  
440 Streptomycin-Glutamine (Pen/Strep/G, 100X = 10,000 units of penicillin, 10,000  
441 μg of streptomycin, and 29.2 mg/ml of L-glutamine, Gibco).

442

### 443 **DNA sequencing**

444 Aag2 cells were grown in T-150 Flasks until ~80% confluent. Cells were  
445 then washed with dPBS twice and scrapped off in dPBS + 10 μg/ml RNase A  
446 (ThermoFisher). Genomic DNA (gDNA) was extracted from ~10<sup>8</sup> Aag2 cells  
447 using the QIAamp DNA Mini Kit according to the manufacturer's instructions with  
448 the optional RNase A treatment. Aag2 gDNA was re-suspended in 10mM Tris  
449 pH8, and the quality and quantity of the sample was assessed using the Agilent  
450 DNA12000 kit and 2100 Bioanalyzer system (Agilent Technologies), as well as  
451 the Qubit dsDNA Broad Range assay kit and Qubit Fluorometer (Thermo Fisher)  
452 and visualized by gel electrophoresis (1% TBE gel). After purification and  
453 quality control, a total of 130 ug of DNA was available for library preparation and  
454 sequencing.

455 SMRTbell libraries were prepared using Pacific Biosciences' Template  
456 Prep Kit 1.0 (PacBio) and a slightly modified version of the Pacific Biosciences'  
457 protocol, "Procedure & Checklist - 20-kb Template Preparation Using BluePippin  
458 Size-Selection System (15-kb Size Cutoff)". Specifically, 52.5ug of gDNA were  
459 hydrodynamically sheared to target sizes of 30kb (26 μg) and 35 kb (26 μg) using  
460 the Megaruptor® (Diogenode) with long hydropores according to the  
461 manufacturer's protocols. Size distributions of the final sheared gDNA were  
462 verified by pulse field electrophoresis of a 100ng sub-aliquot through 0.75%  
463 agarose using the Pippin Pulse (Sage Science), run according to the  
464 manufacturer's "10-48 kb protocol" for 16 hrs. The two sheared samples were  
465 then pooled, for a total of 37ug sheared DNA to be used as input into SMRTbell  
466 preparation. Sheared DNA was subjected to DNA damage repair and ligated to  
467 SMRTbell adapters. Following ligation, extraneous DNA was digested with exo-  
468 nucleases and the resulting SMRTbell library was cleaned and concentrated with  
469 AMPure PB beads (Pacific Biosciences). A total of 20.5ug of library was available  
470 for size selection.

471 Approximately half (10ug) of the SMRTbell pooled SMRTbell library was  
472 size-selected using the BluePippin System (Sage Science) using a 15 kb cutoff  
473 and 0.75% agarose cassettes. To obtain longer read lengths, an additional 5ug  
474 of the library was selected using a 17kb cutoff.

475 Library quality and quantity were assessed using the Agilent 12000 DNA  
476 Kit and 2100 Bioanalyzer System (Agilent Technologies), as well as the Qubit  
477 dsDNA Broad Range Assay kit and Qubit Fluorometer (Thermo Fisher). An

478 additional DNA Damage Repair step and AMPure bead cleanup were included  
479 after size-selection of the libraries.

480 Annealed libraries were then bound to DNA polymerases using 3nM of the  
481 SMRTbell library and 3X excess DNA polymerase at a concentration of 9nM  
482 using Pacific Biosciences DNA/Polymerase Binding Kit 1.0, (Pacific Biosciences).  
483 Bound libraries were sequenced on the Pacific Biosciences RSII using P6/C4  
484 chemistry (PacBio), magnetic bead loading (PacBio) and 6 hour collection times.  
485 84 SMRTcells of the > 15 kb library were loaded at concentrations of 75-100 pM  
486 on-plate. 32 SMRTcells of the > 17 kb library was prepared separately and  
487 loaded at on-plate concentrations of 40 pM and 60 pM. These 116 SMRTcells  
488 generated 92.7 GB of sequencing data, which resulted in approximately 76X  
489 coverage of the Aag2 genome. Average raw read length of 15.5KB, with average  
490 sub-reads length of 13.2kb. Assembly was performed using Quiver/FALCON

491

### 492 **Genome assembly statistics**

493 Basic statistics (e.g. Size, Gaps, N50, L50, # contigs) for each genome  
494 analyzed was produced using Quast (Gurevich, Saveliev, Vyahhi, & Tesler,  
495 2013).

496 As a complementary approach Benchmarking sets of Universal Single-  
497 Copy Orthologs (BUSCO) was also run using the Arthropod dataset in order to  
498 assess the completeness of genome assembly. Of the 2675 BUSCO groups  
499 searched only 81 were missing from the Aag2 assembly, indicating good  
500 assembly completeness. Of the 2315 BUSCOs found only 279 of them were  
501 annotated as fragmented, emphasizing the continuity of the assembly.

502

### 503 **Repeat Identification and Kimura Divergence**

504 In order to *de novo* identify and classify novel repetitive elements from the  
505 Aag2 genome, RepeatModeler was run on the assembled genome using  
506 standard parameters. Outputs from RepeatModeler were cross-referenced with  
507 annotated entries for *Aedes aegypti* from TEfam. All entries from RepeatModeler  
508 that were >80% identical to TEfam entries were discarded as redundant. This  
509 combined annotated and *de novo* identified list of repeat elements was used to  
510 identify the genome wide occurrences of repeats using RepeatMasker using  
511 standard parameters.

512 Kimura scores and corresponding alignment information were extracted  
513 from the “.align” file as output by RepeatMasker. This information was used to  
514 make the stacked plot in figure 2 using R (version 3.30) and the ggplot2 package.

515

516

517 Citations:

518 Smit, AFA, Hubley, R. *RepeatModeler* *Open-1.0.*

519 2008-2015 <<http://www.repeatmasker.org>>

520 Smit, AFA, Hubley, R & Green, P. *RepeatMasker* *Open-4.0.*

521 2013-2015 <<http://www.repeatmasker.org>>.

522 Dr. Zhijian Jake Tu. TEfam. <<http://tefam.biochem.vt.edu/tefam/index.php>>

523

524 **EVE identification**

525 Identification of EVEs was achieved using standalone Blast+ (Altschul,  
526 Gish, Miller, Myers, & Lipman, 1990). Blast Searches were run using the Blastx  
527 command specifying the genome as the query and a refseq library composed of  
528 the ssRNA and dsRNA viral protein-coding sequences from the NCBI genomes  
529 as the database. The E-value threshold was set at 10<sup>-6</sup>.

530 The EVE with the lower E-value was chosen for further analysis to predict  
531 EVEs that overlapped. Several Blast hits to viral protein genes were identified as  
532 artifacts because of their homology to eukaryotic genes (e.g. closteroviruses  
533 encode an Hsp70 homologue). These artifacts were filtered by hand.  
534

535 **Identification of LTR enrichment near EVEs**

536 Separate BED files containing all TEs in the Aag2 assembly and all EVEs  
537 in the Aag2 assembly were used as input to Bedtools (*bedtools closest* command  
538 using the *-io* flag, and *-id* or *-iu*) to find the single closest non-overlapping TE to  
539 each EVE (both upstream and downstream).

540 An in-house script compiled these two output files together and filtered  
541 them for the TE content of interest. TE categories (subclass, family, element)  
542 were assigned by RepeatMasker. Enrichment was compared to the prevalence  
543 of the TE element genome wide based on a one-sided binomial test. Stacked  
544 histograms were produced based on TE categories as found in Figure 3. The  
545 legend lists (up to) the 10 most prevalent TE elements of TE/EVE pairs in the  
546 same orientation. Plots were produced using Python (version 2.7.6) with the  
547 pandas and matplotlib plugins.  
548

549 **Classification of nearest TE to EVEs by virus taxonomy**

550 Taxonomy categories for viruses from which each EVEs derived were  
551 assigned using an in-house script. Assignments were made based on NCBI's  
552 taxonomy database (<ftp://ftp.ncbi.nih.gov/pub/taxonomy/>), with the following  
553 additional annotations by hand.  
554

| Virus species                    | Assigned family |
|----------------------------------|-----------------|
| <i>Wuhan Mosquito Virus 8</i>    | Chuviridae      |
| <i>Wuchang Cockroach Virus 3</i> | Chuviridae      |
| <i>Lishi Spider Virus 1</i>      | Chuviridae      |
| <i>Shayang Fly Virus 1</i>       | Chuviridae      |
| <i>Wenzhou Crab Virus 2</i>      | Chuviridae      |
| <i>Bole Tick Virus 2</i>         | Rhabdoviridae   |
| <i>Shayang Fly Virus 2</i>       | Rhabdoviridae   |
| <i>Wuhan Ant Virus</i>           | Rhabdoviridae   |
| <i>Wuhan Fly Virus 2</i>         | Rhabdoviridae   |
| <i>Wuhan House Fly Virus 1</i>   | Rhabdoviridae   |
| <i>Wuhan Mosquito Virus 9</i>    | Rhabdoviridae   |

|                                             |               |
|---------------------------------------------|---------------|
| <i>Yongjia Tick Virus 2</i>                 | Rhabdoviridae |
| <i>Cilv-C</i>                               | Virgaviridae  |
| <i>Citrus leprosis virus C</i>              | Virgaviridae  |
| <i>Blueberry necrotic ring blotch virus</i> | Virgaviridae  |
| <i>Wutai Mosquito Virus</i>                 | Bunyaviridae  |

555

556 Heat maps were produced using the Seaborn plugin for python. Only TEs  
557 with  $\geq 10\%$  proportion in at least one sample (Flaviviridae, Chuviridae, or  
558 Rhabdoviridae) are shown. Color was assigned based on proportion of TE  
559 element/family in each viral category.

560 Enrichment was scored as above using a one-sided binomial test  
561 (significant is p-value  $< 0.0001$ ).

562

### 563 **Small RNA bioinformatics**

564 Adaptors were trimmed using Cutadapt  
565 (<http://dx.doi.org/10.14806/ej.17.1.200>) using the --discard-untrimmed and -m 19  
566 flags to discard reads without adaptors and below 19 nt in length. Reads were  
567 mapped using bowtie (Langmead, Trapnell, Pop, & Salzberg, 2009) using the -v  
568 1 flag (-v 3 in the case of Fig 5D and S5). Read distance overlaps were  
569 generated by viROME (Watson, Schnettler, & Kohl, 2013). Uniquely mapping  
570 piRNAs were used for Figure 4C (-m1 flag).

### 571 **piCluster Analysis**

572 piClusters were identified using PROtrac (Rosenkranz & Zischler, 2012)  
573 based on mapping with positions for beta-eliminated small RNAs libraries from  
574 Aag2 cells from sRNAmapper.pl. Based on these predictions, visualizations of  
575 clusters were produced using EasyFig (Sullivan, Petty, & Beatson, 2011) for  
576 visualization of TEs and R for comparison of TEs, piRNA abundance and EVE  
577 positions.

### 578 **Sequence alignment and phylogenetic analysis**

579 For phylogenetic analysis of Flaviviridae, polyprotein sequences from 61  
580 members of the Flaviviridae family were aligned with MUSCLE (Edgar, 2004) and  
581 a maximum likelihood tree was generated with FastTree (Price, Dehal, & Arkin,  
582 2009) using the generalised time reversible substitution model ("-gtr"). Trees  
583 were visualized and annotated with ggtree (DOI: 10.1111/2041-210X.12628).

584

### 585 **EVE coverage**

586 Base R (version 3.3.0) was used to show regions individual EVEs span on  
587 the indicated viral family (and protein). EVE length is a function of the percentage  
588 of the respective ORF from which it derives.

589

### 590 **Data**

### **availability**

591 The Aag2 genome (v 1.00) is available through VectorBase  
592 (<https://www.vectorbase.org/organisms/aedes-aegypti/aag2/aag2>).

593 Main datasets produced during this work have been provided in excel format.

594

## 595 REFERENCES

596

597 Altschul, S. F., Gish, W., Miller, W., Myers, E. W., & Lipman, D. J. (1990). Basic local  
598 alignment search tool. *J Mol Biol*, *215*(3), 403-410. doi: 10.1016/S0022-  
599 2836(05)80360-2

600 S0022-2836(05)80360-2 [pii]

601 Arensburger, P., Hice, R. H., Wright, J. A., Craig, N. L., & Atkinson, P. W. (2011). The  
602 mosquito *Aedes aegypti* has a large genome size and high transposable element  
603 load but contains a low proportion of transposon-specific piRNAs. *BMC*  
604 *Genomics*, *12*, 606. doi: 10.1186/1471-2164-12-606

605 1471-2164-12-606 [pii]

606 Aswad, A., & Katzourakis, A. (2012). Paleovirology and virally derived immunity. *Trends*  
607 *Ecol Evol*, *27*(11), 627-636. doi: 10.1016/j.tree.2012.07.007

608 S0169-5347(12)00168-1 [pii]

609 Belyi, V. A., Levine, A. J., & Skalka, A. M. (2010a). Sequences from ancestral single-  
610 stranded DNA viruses in vertebrate genomes: the parvoviridae and circoviridae  
611 are more than 40 to 50 million years old. *J Virol*, *84*(23), 12458-12462. doi:  
612 10.1128/JVI.01789-10

613 JVI.01789-10 [pii]

614 Belyi, V. A., Levine, A. J., & Skalka, A. M. (2010b). Unexpected inheritance: multiple  
615 integrations of ancient bornavirus and ebolavirus/marburgvirus sequences in  
616 vertebrate genomes. *PLoS Pathog*, *6*(7), e1001030. doi:  
617 10.1371/journal.ppat.1001030

618 Bennett, K. E., Olson, K. E., Munoz Mde, L., Fernandez-Salas, I., Farfan-Ale, J. A.,  
619 Higgs, S., . . . Beaty, B. J. (2002). Variation in vector competence for dengue 2  
620 virus among 24 collections of *Aedes aegypti* from Mexico and the United States.  
621 *Am J Trop Med Hyg*, *67*(1), 85-92.

622 Bhatt, S., Gething, P. W., Brady, O. J., Messina, J. P., Farlow, A. W., Moyes, C. L., . . .  
623 Hay, S. I. (2013). The global distribution and burden of dengue. *Nature*,  
624 *496*(7446), 504-507. doi: 10.1038/nature12060

625 nature12060 [pii]

626 Chen, X. G., Jiang, X., Gu, J., Xu, M., Wu, Y., Deng, Y., . . . James, A. A. (2015).  
627 Genome sequence of the Asian Tiger mosquito, *Aedes albopictus*, reveals  
628 insights into its biology, genetics, and evolution. *Proc Natl Acad Sci U S A*,  
629 *112*(44), E5907-5915. doi: 10.1073/pnas.1516410112

630 1516410112 [pii]

631 Chuong, E. B., Elde, N. C., & Feschotte, C. (2016). Regulatory evolution of innate  
632 immunity through co-option of endogenous retroviruses. *Science*, *351*(6277),  
633 1083-1087. doi: 10.1126/science.aad5497

634 351/6277/1083 [pii]

635 Conzelmann, K. K. (1998). Nonsegmented negative-strand RNA viruses: genetics and  
636 manipulation of viral genomes. *Annu Rev Genet*, *32*, 123-162. doi:  
637 10.1146/annurev.genet.32.1.123

638 Cotton, J. A., Steinbiss, S., Yokoi, T., Tsai, I. J., & Kikuchi, T. (2016). An expressed,  
639 endogenous Nodavirus-like element captured by a retrotransposon in the  
640 genome of the plant parasitic nematode *Bursaphelenchus xylophilus*. *Sci Rep*, *6*,  
641 39749. doi: 10.1038/srep39749

642 srep39749 [pii]

643 Czech, B., & Hannon, G. J. (2016). One Loop to Rule Them All: The Ping-Pong Cycle  
644 and piRNA-Guided Silencing. *Trends Biochem Sci*, *41*(4), 324-337. doi:  
645 10.1016/j.tibs.2015.12.008



- 646 S0968-0004(15)00258-3 [pii]  
647 Delviks-Frankenberry, K., Galli, A., Nikolaitchik, O., Mens, H., Pathak, V. K., & Hu, W. S.  
648 (2011). Mechanisms and factors that influence high frequency retroviral  
649 recombination. *Viruses*, 3(9), 1650-1680. doi: 10.3390/v3091650  
650 viruses-03-01650 [pii]  
651 Dudchenko, O., Batra, S. S., Omer, A. D., Nyquist, S. K., Hoeger, M., Durand, N. C., . . .  
652 Aiden, E. L. (2017). De novo assembly of the *Aedes aegypti* genome using Hi-C  
653 yields chromosome-length scaffolds. *Science*. doi: eaal3327 [pii]  
654 10.1126/science.aal3327  
655 science.aal3327 [pii]  
656 Edgar, R. C. (2004). MUSCLE: multiple sequence alignment with high accuracy and high  
657 throughput. *Nucleic Acids Res*, 32(5), 1792-1797. doi: 10.1093/nar/gkh340  
658 32/5/1792 [pii]  
659 Feschotte, C., & Gilbert, C. (2012). Endogenous viruses: insights into viral evolution and  
660 impact on host biology. *Nat Rev Genet*, 13(4), 283-296. doi: 10.1038/nrg3199  
661 nrg3199 [pii]  
662 Geuking, M. B., Weber, J., Dewannieux, M., Gorelik, E., Heidmann, T., Hengartner, H., .  
663 . . Hangartner, L. (2009). Recombination of retrotransposon and exogenous RNA  
664 virus results in nonretroviral cDNA integration. *Science*, 323(5912), 393-396. doi:  
665 10.1126/science.1167375  
666 323/5912/393 [pii]  
667 Gifford, W. D., Pfaff, S. L., & Macfarlan, T. S. (2013). Transposable elements as genetic  
668 regulatory substrates in early development. *Trends Cell Biol*, 23(5), 218-226. doi:  
669 10.1016/j.tcb.2013.01.001  
670 S0962-8924(13)00003-2 [pii]  
671 Gilbert, C., & Feschotte, C. (2010). Genomic fossils calibrate the long-term evolution of  
672 hepadnaviruses. *PLoS Biol*, 8(9). doi: 10.1371/journal.pbio.1000495  
673 e1000495 [pii]  
674 Goic, B., Stapleford, K. A., Frangeul, L., Doucet, A. J., Gausson, V., Blanc, H., . . .  
675 Saleh, M. C. (2016). Virus-derived DNA drives mosquito vector tolerance to  
676 arboviral infection. *Nat Commun*, 7, 12410. doi: 10.1038/ncomms12410  
677 ncomms12410 [pii]  
678 Goic, B., Vodovar, N., Mondotte, J. A., Monot, C., Frangeul, L., Blanc, H., . . . Saleh, M.  
679 C. (2013). RNA-mediated interference and reverse transcription control the  
680 persistence of RNA viruses in the insect model *Drosophila*. *Nat Immunol*, 14(4),  
681 396-403. doi: 10.1038/ni.2542  
682 ni.2542 [pii]  
683 Gurevich, A., Saveliev, V., Vyahhi, N., & Tesler, G. (2013). QUASt: quality assessment  
684 tool for genome assemblies. *Bioinformatics*, 29(8), 1072-1075. doi:  
685 10.1093/bioinformatics/btt086  
686 btt086 [pii]  
687 Hess, A. M., Prasad, A. N., Ptitsyn, A., Ebel, G. D., Olson, K. E., Barbacioru, C., . . .  
688 Campbell, C. L. (2011). Small RNA profiling of Dengue virus-mosquito  
689 interactions implicates the PIWI RNA pathway in anti-viral defense. *BMC*  
690 *Microbiol*, 11, 45. doi: 10.1186/1471-2180-11-45  
691 1471-2180-11-45 [pii]  
692 Holmes, E. C. (2011). The evolution of endogenous viral elements. *Cell Host Microbe*,  
693 10(4), 368-377. doi: 10.1016/j.chom.2011.09.002  
694 S1931-3128(11)00285-X [pii]

- 695 Honda, T., & Tomonaga, K. (2016). Endogenous non-retroviral RNA virus elements  
696 evidence a novel type of antiviral immunity. *Mob Genet Elements*, 6(3),  
697 e1165785. doi: 10.1080/2159256X.2016.1165785  
698 1165785 [pii]
- 699 Horie, M., Honda, T., Suzuki, Y., Kobayashi, Y., Daito, T., Oshida, T., . . . Tomonaga, K.  
700 (2010). Endogenous non-retroviral RNA virus elements in mammalian genomes.  
701 *Nature*, 463(7277), 84-87. doi: 10.1038/nature08695  
702 nature08695 [pii]
- 703 Katzourakis, A., & Gifford, R. J. (2010). Endogenous viral elements in animal genomes.  
704 *PLoS Genet*, 6(11), e1001191. doi: 10.1371/journal.pgen.1001191
- 705 Kimura, M. (1980). A simple method for estimating evolutionary rates of base  
706 substitutions through comparative studies of nucleotide sequences. *J Mol Evol*,  
707 16(2), 111-120.
- 708 Kraemer, M. U., Sinka, M. E., Duda, K. A., Mylne, A. Q., Shearer, F. M., Barker, C. M., . .  
709 . Hay, S. I. (2015). The global distribution of the arbovirus vectors *Aedes aegypti*  
710 and *Ae. albopictus*. *Elife*, 4, e08347. doi: 10.7554/eLife.08347
- 711 Kramer, L. D. (2016). Complexity of virus-vector interactions. *Curr Opin Virol*, 21, 81-86.  
712 doi: S1879-6257(16)30104-3 [pii]  
713 10.1016/j.coviro.2016.08.008
- 714 Kramer, L. D., & Ciota, A. T. (2015). Dissecting vectorial capacity for mosquito-borne  
715 viruses. *Curr Opin Virol*, 15, 112-118. doi: 10.1016/j.coviro.2015.10.003  
716 S1879-6257(15)00153-4 [pii]
- 717 Lan, Q., & Fallon, A. M. (1990). Small heat shock proteins distinguish between two  
718 mosquito species and confirm identity of their cell lines. *Am J Trop Med Hyg*,  
719 43(6), 669-676.
- 720 Langmead, B., Trapnell, C., Pop, M., & Salzberg, S. L. (2009). Ultrafast and memory-  
721 efficient alignment of short DNA sequences to the human genome. *Genome Biol*,  
722 10(3), R25. doi: 10.1186/gb-2009-10-3-r25  
723 gb-2009-10-3-r25 [pii]
- 724 Lee, A., Nolan, A., Watson, J., & Tristem, M. (2013). Identification of an ancient  
725 endogenous retrovirus, predating the divergence of the placental mammals.  
726 *Philos Trans R Soc Lond B Biol Sci*, 368(1626), 20120503. doi:  
727 10.1098/rstb.2012.0503  
728 rstb.2012.0503 [pii]
- 729 Lesbats, P., Engelman, A. N., & Cherepanov, P. (2016). Retroviral DNA Integration.  
730 *Chem Rev*, 116(20), 12730-12757. doi: 10.1021/acs.chemrev.6b00125
- 731 Li, C. X., Shi, M., Tian, J. H., Lin, X. D., Kang, Y. J., Chen, L. J., . . . Zhang, Y. Z. (2015).  
732 Unprecedented genomic diversity of RNA viruses in arthropods reveals the  
733 ancestry of negative-sense RNA viruses. *Elife*, 4. doi: 10.7554/eLife.05378
- 734 Maringer, K., Yousuf, A., Heesom, K. J., Fan, J., Lee, D., Fernandez-Sesma, A., . . .  
735 Davidson, A. D. (2017). Proteomics informed by transcriptomics for  
736 characterising active transposable elements and genome annotation in *Aedes*  
737 *aegypti*. *BMC Genomics*, 18(1), 101. doi: 10.1186/s12864-016-3432-5  
738 10.1186/s12864-016-3432-5 [pii]
- 739 Miesen, P., Girardi, E., & van Rij, R. P. (2015). Distinct sets of PIWI proteins produce  
740 arbovirus and transposon-derived piRNAs in *Aedes aegypti* mosquito cells.  
741 *Nucleic Acids Res*, 43(13), 6545-6556. doi: 10.1093/nar/gkv590  
742 gkv590 [pii]
- 743 Miesen, P., Ivens, A., Buck, A. H., & van Rij, R. P. (2016). Small RNA Profiling in  
744 Dengue Virus 2-Infected *Aedes* Mosquito Cells Reveals Viral piRNAs and Novel

- 745 Host miRNAs. *PLoS Negl Trop Dis*, 10(2), e0004452. doi:  
746 10.1371/journal.pntd.0004452  
747 PNTD-D-15-01748 [pii]  
748 Miesen, P., Joosten, J., & van Rij, R. P. (2016). PIWIs Go Viral: Arbovirus-Derived  
749 piRNAs in Vector Mosquitoes. *PLoS Pathog*, 12(12), e1006017. doi:  
750 10.1371/journal.ppat.1006017  
751 PPATHOGENS-D-16-02114 [pii]  
752 Mongelli, V., & Saleh, M. C. (2016). Bugs Are Not to Be Silenced: Small RNA Pathways  
753 and Antiviral Responses in Insects. *Annu Rev Virol*, 3(1), 573-589. doi:  
754 10.1146/annurev-virology-110615-042447  
755 Nene, V., Wortman, J. R., Lawson, D., Haas, B., Kodira, C., Tu, Z. J., . . . Severson, D.  
756 W. (2007). Genome sequence of *Aedes aegypti*, a major arbovirus vector.  
757 *Science*, 316(5832), 1718-1723. doi: 1138878 [pii]  
758 10.1126/science.1138878  
759 Palatini, U., Miesen, P., Carballar-Lejarazu, R., Ometto, L., Rizzo, E., Tu, Z., . . .  
760 Bonizzoni, M. (2017). Comparative genomics shows that viral integrations are  
761 abundant and express piRNAs in the arboviral vectors *Aedes aegypti* and *Aedes*  
762 *albopictus*. *BMC Genomics*, 18(1), 512. doi: 10.1186/s12864-017-3903-3  
763 10.1186/s12864-017-3903-3 [pii]  
764 Parrish, N. F., Fujino, K., Shiromoto, Y., Iwasaki, Y. W., Ha, H., Xing, J., . . . Tomonaga,  
765 K. (2015). piRNAs derived from ancient viral processed pseudogenes as  
766 transgenerational sequence-specific immune memory in mammals. *RNA*, 21(10),  
767 1691-1703. doi: 10.1261/rna.052092.115  
768 rna.052092.115 [pii]  
769 Peleg, J. (1968). Growth of arboviruses in monolayers from subcultured mosquito  
770 embryo cells. *Virology*, 35(4), 617-619.  
771 Price, M. N., Dehal, P. S., & Arkin, A. P. (2009). FastTree: computing large minimum  
772 evolution trees with profiles instead of a distance matrix. *Mol Biol Evol*, 26(7),  
773 1641-1650. doi: 10.1093/molbev/msp077  
774 msp077 [pii]  
775 Rosenkranz, D., Rudloff, S., Bastuck, K., Ketting, R. F., & Zischler, H. (2015). Tupaia  
776 small RNAs provide insights into function and evolution of RNAi-based  
777 transposon defense in mammals. *RNA*, 21(5), 911-922. doi:  
778 10.1261/rna.048603.114  
779 rna.048603.114 [pii]  
780 Rosenkranz, D., & Zischler, H. (2012). proTRAC--a software for probabilistic piRNA  
781 cluster detection, visualization and analysis. *BMC Bioinformatics*, 13, 5. doi:  
782 10.1186/1471-2105-13-5  
783 1471-2105-13-5 [pii]  
784 Staginnus, C., Gregor, W., Mette, M. F., Teo, C. H., Borroto-Fernandez, E. G., Machado,  
785 M. L., . . . Schwarzacher, T. (2007). Endogenous pararetroviral sequences in  
786 tomato (*Solanum lycopersicum*) and related species. *BMC Plant Biol*, 7, 24. doi:  
787 1471-2229-7-24 [pii]  
788 10.1186/1471-2229-7-24  
789 Sullivan, M. J., Petty, N. K., & Beatson, S. A. (2011). Easyfig: a genome comparison  
790 visualizer. *Bioinformatics*, 27(7), 1009-1010. doi: 10.1093/bioinformatics/btr039  
791 btr039 [pii]  
792 Suzuki, Y., Frangeul, L., Dickson, L. B., Blanc, H., Verdier, Y., Vinh, J., . . . Saleh, M. C.  
793 (2017). Uncovering the repertoire of endogenous flaviviral elements in *Aedes*  
794 mosquito genomes. *J Virol*. doi: JVI.00571-17 [pii]  
795 10.1128/JVI.00571-17



796 Taylor, D. J., Leach, R. W., & Bruenn, J. (2010). Filoviruses are ancient and integrated  
797 into mammalian genomes. *BMC Evol Biol*, *10*, 193. doi: 10.1186/1471-2148-10-  
798 193  
799 1471-2148-10-193 [pii]  
800 Thompson, P. J., Macfarlan, T. S., & Lorincz, M. C. (2016). Long Terminal Repeats:  
801 From Parasitic Elements to Building Blocks of the Transcriptional Regulatory  
802 Repertoire. *Mol Cell*, *62*(5), 766-776. doi: 10.1016/j.molcel.2016.03.029  
803 S1097-2765(16)30012-0 [pii]  
804 Varjak, M., Maringer, K., Watson, M., Sreenu, V. B., Fredericks, A. C., Pondeville, E., . . .  
805 Schnettler, E. (2017). *Aedes aegypti* Piwi4 Is a Noncanonical PIWI Protein  
806 Involved in Antiviral Responses. *mSphere*, *2*(3). doi: e00144-17 [pii]  
807 10.1128/mSphere.00144-17  
808 mSphere00144-17 [pii]  
809 Vicoso, B., & Bachtrog, D. (2015). Numerous transitions of sex chromosomes in Diptera.  
810 *PLoS Biol*, *13*(4), e1002078. doi: 10.1371/journal.pbio.1002078  
811 PBIOLGY-D-14-02861 [pii]  
812 Watson, M., Schnettler, E., & Kohl, A. (2013). viRome: an R package for the  
813 visualization and analysis of viral small RNA sequence datasets. *Bioinformatics*,  
814 *29*(15), 1902-1903. doi: 10.1093/bioinformatics/btt297  
815 btt297 [pii]  
816 Yamanaka, S., Siomi, M. C., & Siomi, H. (2014). piRNA clusters and open chromatin  
817 structure. *Mob DNA*, *5*, 22. doi: 10.1186/1759-8753-5-22  
818 1759-8753-5-22 [pii]  
819  
820  
821

## 822 LEGENDS FOR MAIN FIGURES

823

824 **Figure 1. Contiguity of the *Aedes aegypti* genome is drastically improved in**  
825 **the Aag2 assembly.** (A) Histogram of contig length vs. total amount of sequence  
826 contained in each bin. The Aag2 assembly achieved the largest contig sizes (by  
827 an order of magnitude) compared to previous *Aedes aegypti*-derived assemblies.  
828 This large contig size also resulted in more overall sequence information/number  
829 of bases. (B) Boxplots indicating number of contigs aligned between LVP  
830 (Sanger) and Aag2 (PacBio). When aligned to each other, more contigs from  
831 LVP are aligned to larger Aag2 contigs than vice versa.

832

833 **Figure 2. Identification of Endogenous Viral Elements (EVEs) in the Aag2**  
834 **assembly** (A) Bar plots showing the number (top) and total length (bottom) of  
835 EVEs derived from each viral family. (B) Histogram showing the size distribution  
836 of EVEs in the Aag2 genome (top) and the total number of bases pairs derived  
837 from EVEs of a given size. The median EVE size (620bp) is indicated with a  
838 black bar.

839 (C) Coverage plots of EVEs derived from the viral families (i) Flaviviridae, (ii)  
840 Rhabdoviridae, and (iii) Chuviridae. Each bar represents a single EVE, while its  
841 length and position denotes the region of the indicated ORF from which its  
842 sequence is derived. Length is expressed as a percentage of the total ORF to  
843 normalize for varying ORF lengths among different members of a given viral  
844 family. The genome organization of CFAV is presented for reference in (i). In (ii)  
845 and (iii), a generic genome is presented to illustrate from where EVEs are  
846 derived within the genome and within each specific ORF.

847 (D) Phylogenetic relationship between 61 members of Flaviviridae. EVEs present  
848 in (i) *Ae. aegypti* or (ii) *Ae. albopictus* which align to the indicated virus are  
849 marked with a colored circle. Size corresponds to abundance of EVEs derived  
850 from given species.

851

852 **Figure 3. The repeat landscape of the *Aedes aegypti* genome is**  
853 **predominantly made up of transposable elements.** (A) Pie chart representing  
854 relative numbers repetitive elements in the Aag2 genome. Further detail can be  
855 found in Table 2.

856 (B) Stacked histogram of Kimura divergence for classes of TEs found in the Aag2  
857 assembly, expressed as a function of percentage of the genome. A relatively  
858 recent expansion/active phase of LTRs is evident (increase in LTRs at low  
859 Kimura divergence scores). Kimura divergence scores are based on the  
860 accumulated mutations of a given TE sequence compared to a consensus.

861 (C) Histograms showing counts of non-overlapping TEs closest to EVEs binned  
862 by distance, both upstream (negative x-axis values) and downstream (positive x-  
863 axis values). Positive y-axis counts refer to TE/EVE 'pairs' with the same  
864 strandedness, while negative y-axis counts are EVEs where the closest TE has  
865 the opposite strandedness. Total counts represented in each histogram: All  
866 classes (n=942); LTR only (n=614); No LTRs (n=328); Ty3/gypsy only (n=358);  
867 Pao Bel only (n=226); Ty1/copia only (n=30).

868 (D) Heatmap showing categories of TEs nearest EVEs, categorized by the viral  
869 family from which the EVEs were derived. Only TEs with the same strandedness  
870 as its nearest EVE are shown. A “\*” indicates significant enrichment by one-sided  
871 binomial test against the background prevalence of a given TE category in the  
872 genome (eg among all LTRs nearest Chuviridae-derived EVEs, Pao Bel  
873 elements are specifically enriched compared to the genome-wide counts of Pao  
874 Bel among all LTRs). Color indicates proportion of a given TE category nearest  
875 EVEs derived from the indicated viral family. Grey indicates the element was not  
876 found to be the closest TE to any EVEs derived from the indicated viral family.  
877 Only TE elements which made up at least 10% of the dataset for a given viral  
878 family are shown. “Pao Bel elements” refers to Chuviridae, while “Ty3/gypsy  
879 elements” corresponds to Flaviviridae and Rhabdoviridae. Total sample size of  
880 all TEs analyzed for each dataset: LTRs- Rhabdoviridae (n=130), Flaviviridae  
881 (n=181), Chuviridae (n=107); Pao Bel- Chuviridae (n=84); Ty3/gypsy-  
882 Rhabdoviridae (n=100), Flaviviridae (n=136).

883

884 **Figure 4. EVEs are primarily associated with LTR transposable elements.**

885 (A) Circle plot showing the arrangement and diversity of TE subclasses in the ten  
886 largest contigs in the Aag2 assembly. Individual contigs are denoted with  
887 staggered black bars. Specific TE elements are shown as dots, concentric rings  
888 represent individual families within each TE subclass. Large scale fluctuations in  
889 TE density can be seen in specific contigs (contig 000015F, boxed).

890 (B) Local density plots of a representative region of local LTR density in contig  
891 000015F.

892 (C) The regions of local LTR density corresponds to the location of numerous  
893 EVEs (black arrows) and piRNA density (bar chart, bottom track).

894 Bioinformatically predicted piCluster corresponding to a portion of the large LTR  
895 density in contig 000015F. LTRs (shown as black bars) are interspersed with  
896 EVE sequences (colored by virus family). piRNA production (black bars, below)  
897 shows highest density in regions corresponding to EVE sequences.

898 (D) Dotplot showing the relationship between piCluster EVE content and piRNA  
899 production. piClusters are ranked by piRNA production. (E) Violin plot comparing  
900 the distribution of piRNA density in piClusters with or without EVEs. (F) Violin  
901 plots comparing the number of predicted transcription factor binding sites in  
902 piClusters with or without EVEs.

903

904 **Figure 5. The antiviral potential of the cellular piRNA repertoire.**

905 (A) Bar plot showing the proportion of piRNA mapping to EVE sequences from a  
906 given viral family. Bars are split to show the relative contribution of specific EVE  
907 sequences.

908 (B) Plot showing correlation the genomic footprint of EVEs from specific viral  
909 families in the Aag2 genome and their piRNA production. Bunyavirus and  
910 Chuvirus fall on opposite sides of the trend.

911 (C) The EVE responsible for producing the anti-sense piRNA in (D). A spike of  
912 piRNAs is produced from the EVE (highlighted in orange) within the overall  
913 piCluster.

914 (D) Mapping of cellular piRNAs to the bunyavirus PCLV genome reveals the  
915 pattern of piRNA processing. The sense-piRNA peak is offset by 10-bp from the  
916 antisense-piRNA peak (which also maps to an EVE within the Aag2 genome;  
917 blue line), showing a distinct ping-pong like pattern (highlighted by the grey  
918 rectangle). Interestingly, although the sequence of the antisense piRNAs map  
919 perfectly to the Aag2 genome/EVE, the sense piRNAs map perfectly to the PCLV  
920 virus sequence. piRNA counts are determined by the position of each piRNAs 5'  
921 base. (E) Schematic showing the process of ping-pong piRNA amplification in  
922 the cell. An EVE sequence in a piCluster is transcribed to yield an antigenomic  
923 transcript. This transcript is processed into piRNAs which bind the genome of  
924 infecting viruses. Binding triggers processing of the viral genome into genomic  
925 piRNAs, which bind anti-genomic transcripts, leading to increased processing.  
926  
927

928 **LEGENDS FOR SUPPLEMENTARY FIGURES**

929

930 **S1 Fig. Transposons are distributed throughout the entire Aag2 genome.**

931 (A) Similar plot to Figure 2A, but showing all contigs of the Aag2 assembly.  
932 Circular plot of the Aag2 assembly, with every contig (black rectangles; ordered  
933 by size) and transposable element (circles; colored by TE class). Transposable  
934 elements are prevalent throughout the entire *Ae. aegypti* genome. Rectangles  
935 representing contigs are staggered to indicate relative contig size.

936

937 **S2 Fig. TEs which overlap EVEs are also overrepresented by LTR elements.**

938 (A) Histograms of TEs which overlap EVEs, broken down by the following  
939 categories. The left bin represents TEs whose start is upstream, and end  
940 overlaps the EVE. The 4th bin indicates TEs whose end is downstream, and start  
941 overlaps an EVE. The second bin indicates EVEs whose coordinates surround  
942 the TE. The third bin indicates TEs whose coordinates surround an EVE. Positive  
943 count values indicate TE and EVEs with shared directionality, while negative  
944 values represent TE and EVEs with opposite directionality. Some EVEs showed  
945 multiple overlapping TEs, all of which are represented on the charts.

946 **S3 Fig. EVEs are typically found within unidirectional piRNA clusters.**

947 The left panels correspond to a region of Contig 000933F encoding 4 tandem,  
948 unidirectional piRNA clusters (as identified by proTRAC), each containing EVEs.  
949 Each cluster expresses piRNAs primarily anti-sense to the TEs/EVEs which  
950 define them. Similarly, a single large piRNA cluster on Contig 000044F is shown  
951 in the right panels. The shared directionality between TEs and EVEs (Figure 3B)  
952 is evident. Again, piRNA expression is almost exclusively in the antisense  
953 direction with respect to the TEs/EVEs.

954

955 **S4 Fig. Kimura divergence scores of LTRs only show expansion of Pao Bel**

956 **and Ty3/gypsy elements.** Bar plot of kimura scores assigned to LTRs only,  
957 categorized by TE family and expressed as percent of total genome (as in Figure  
958 2E). At very low (0-1) Kimura divergence scores, Ty3/gypsy and Pao Bel exhibit  
959 a marked increase in proportion of the genome.

960

961 **S5 Fig. piRNA mapping to various viruses.**

962 (A) Same plot as Fig 5D, but showing the entire PCLV nucleocapsid region. (B) piRNAs mapping to Kamiti  
963 River Virus do not show the distinct ping-pong signature as seen for PCLV,  
964 despite a significant antisense piRNA peak deriving from an EVE.

965

966

967

Figure 1

bioRxiv preprint doi: <https://doi.org/10.1101/127498>; this version posted July 15, 2017. The copyright holder for this preprint (which was not certified by peer review) is the author/funder, who has granted bioRxiv a license to display the preprint in perpetuity. It is made available under aCC-BY 4.0 International license.

A

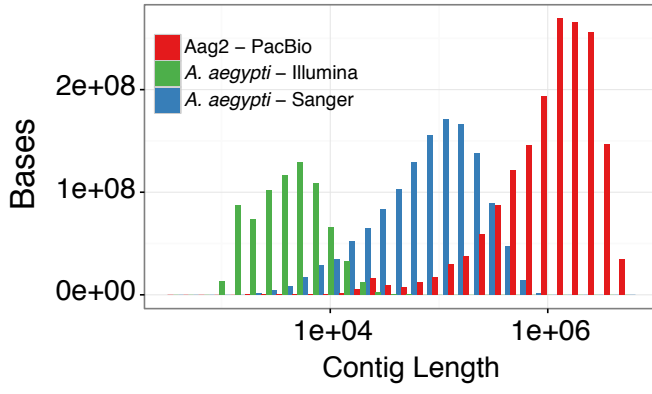

B

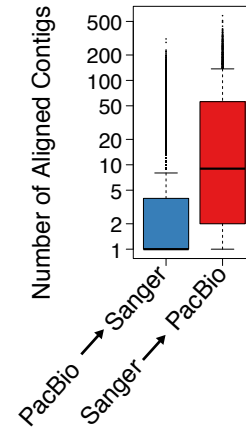

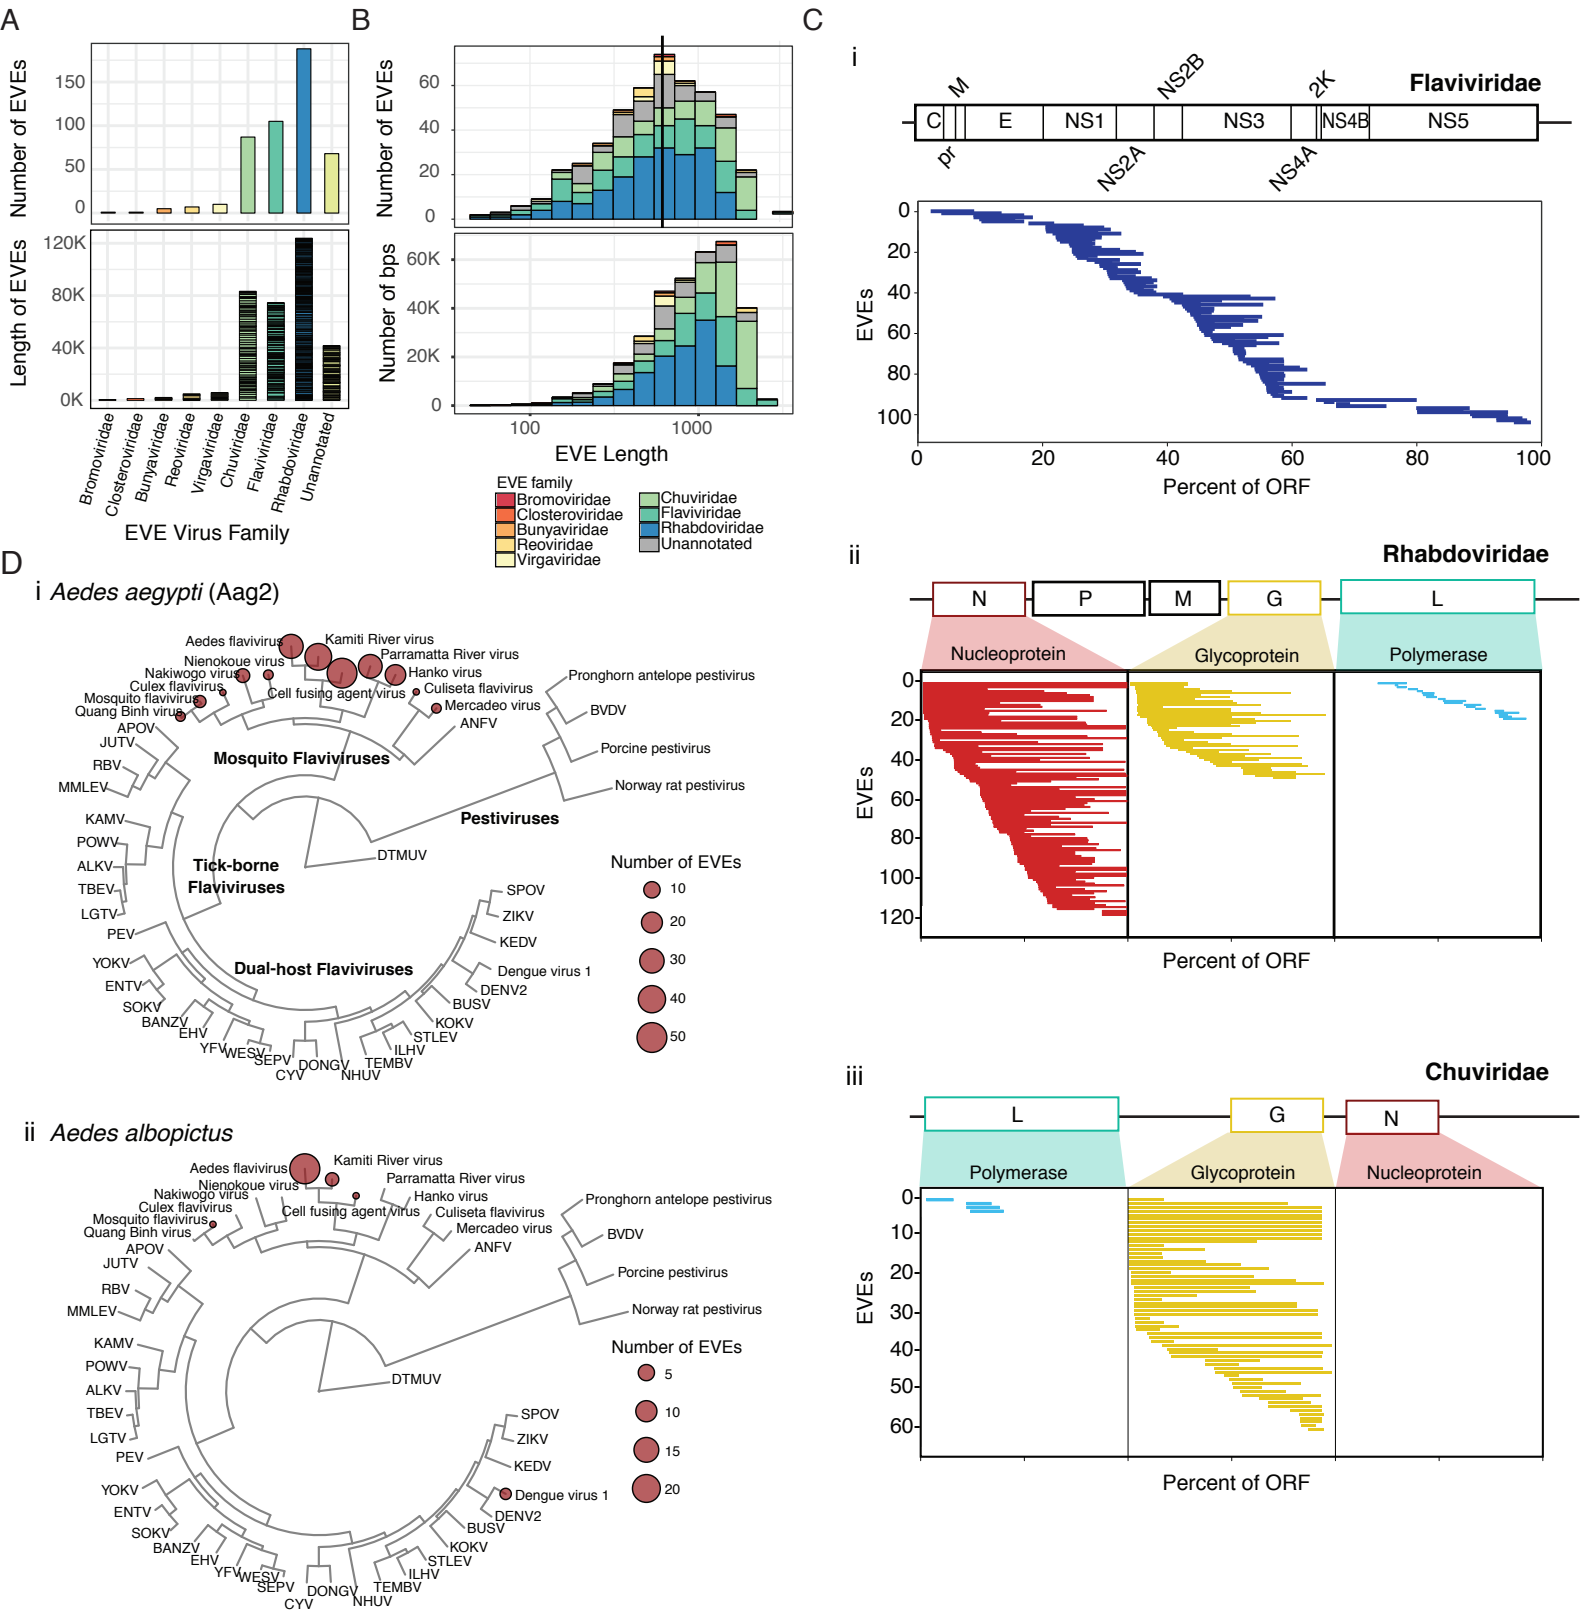

**Figure 3**

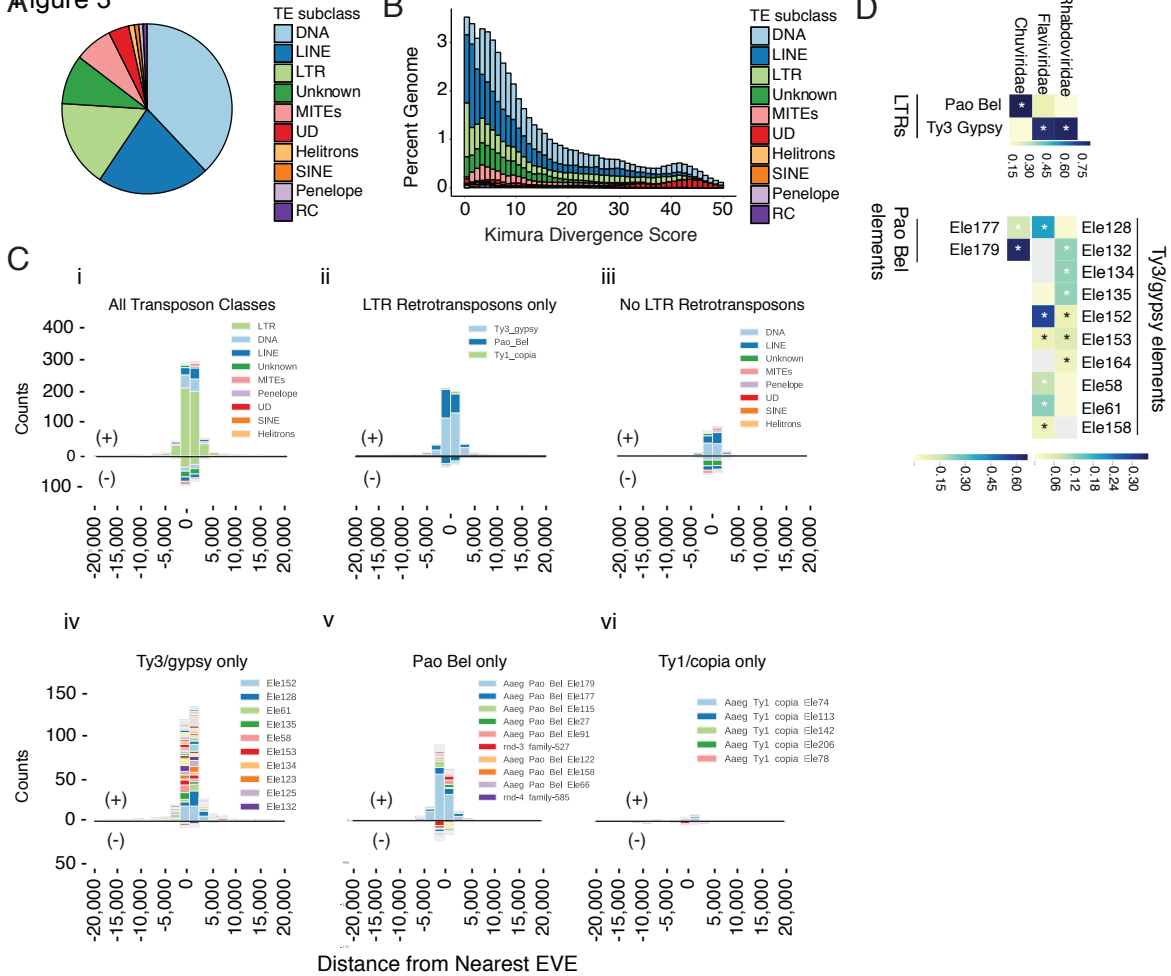



Figure 4

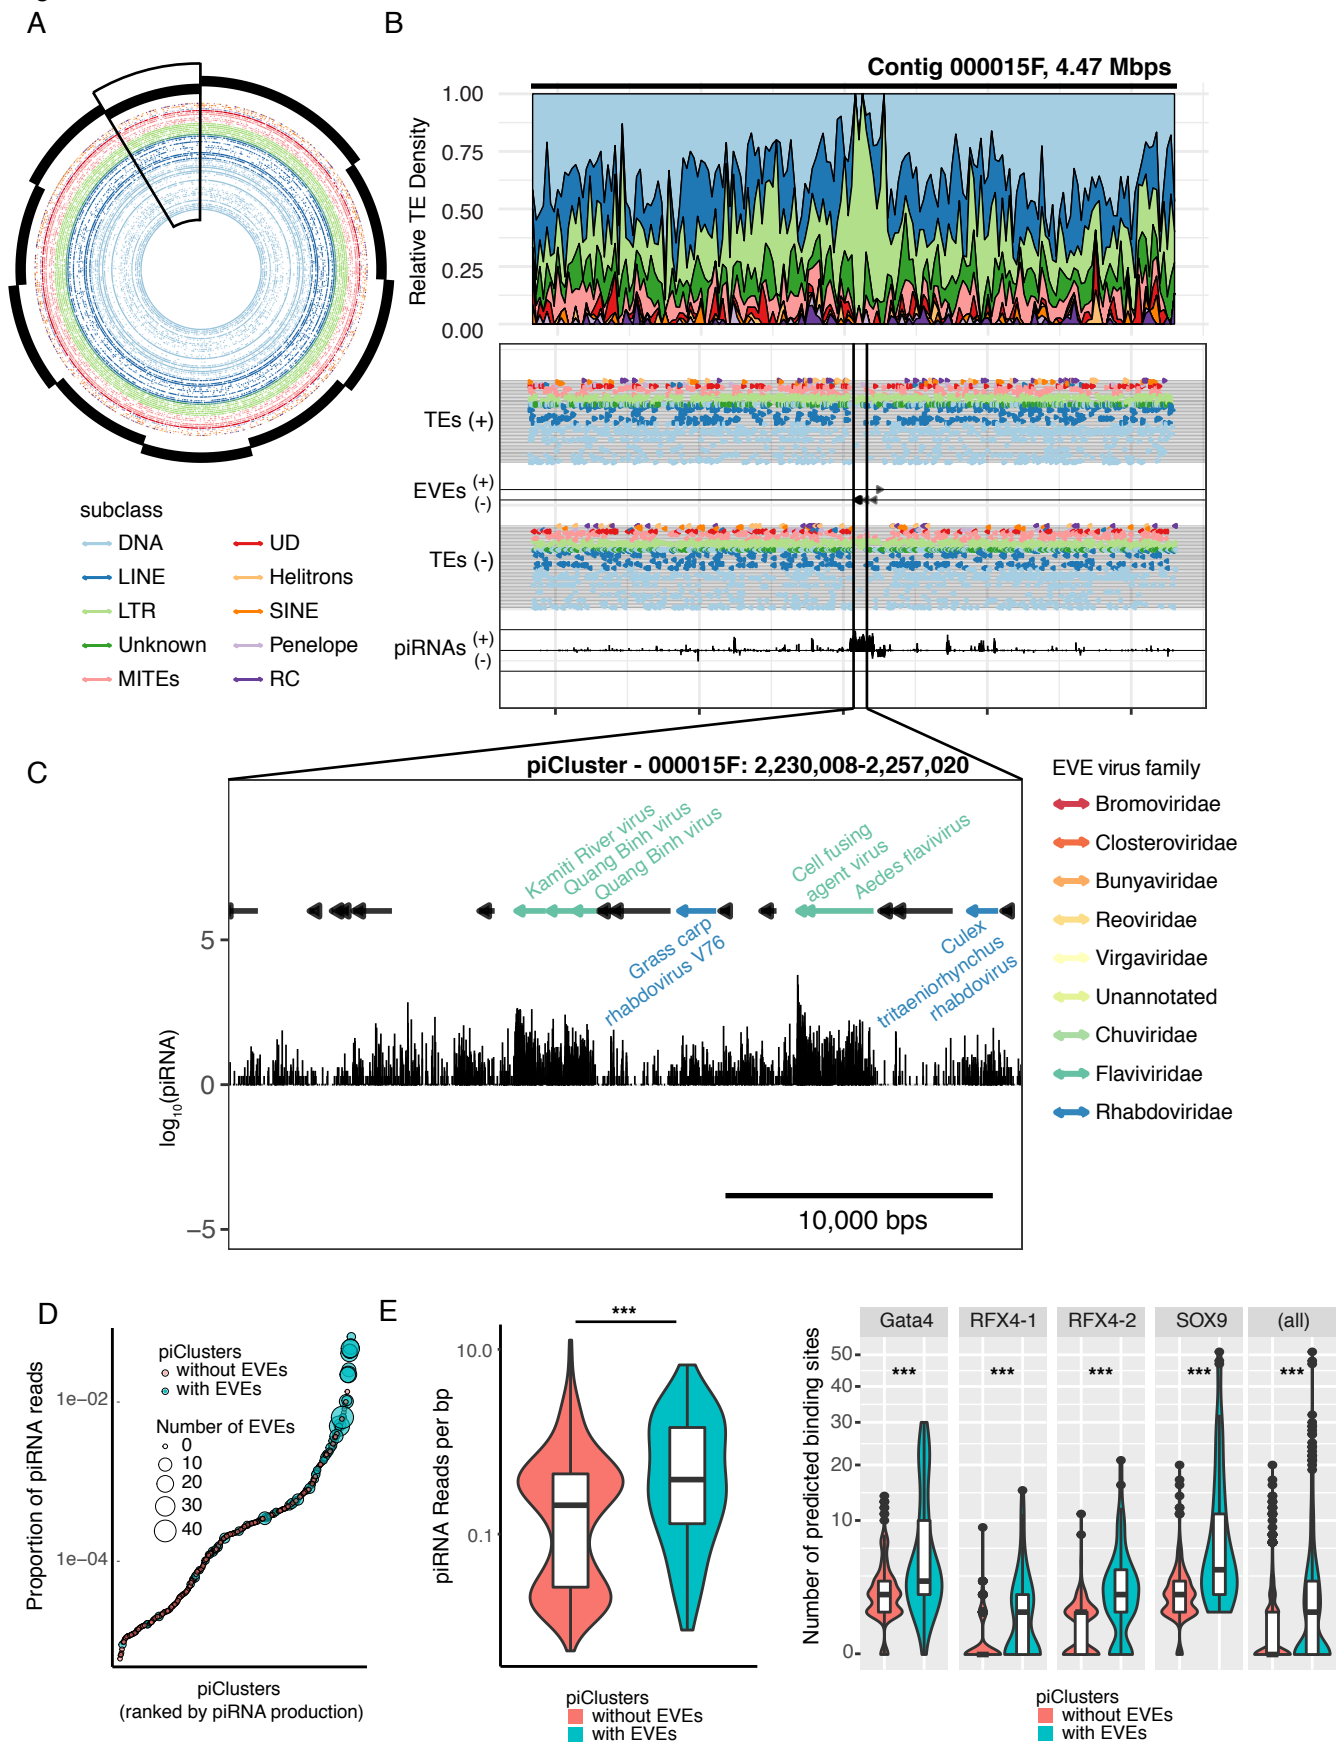

Figure 5

bioRxiv preprint doi: <https://doi.org/10.1101/127498>; this version posted July 15, 2017. The copyright holder for this preprint (which was not certified by peer review) is the author/funder, who has granted bioRxiv a license to display the preprint in perpetuity. It is made available under aCC-BY 4.0 International license.

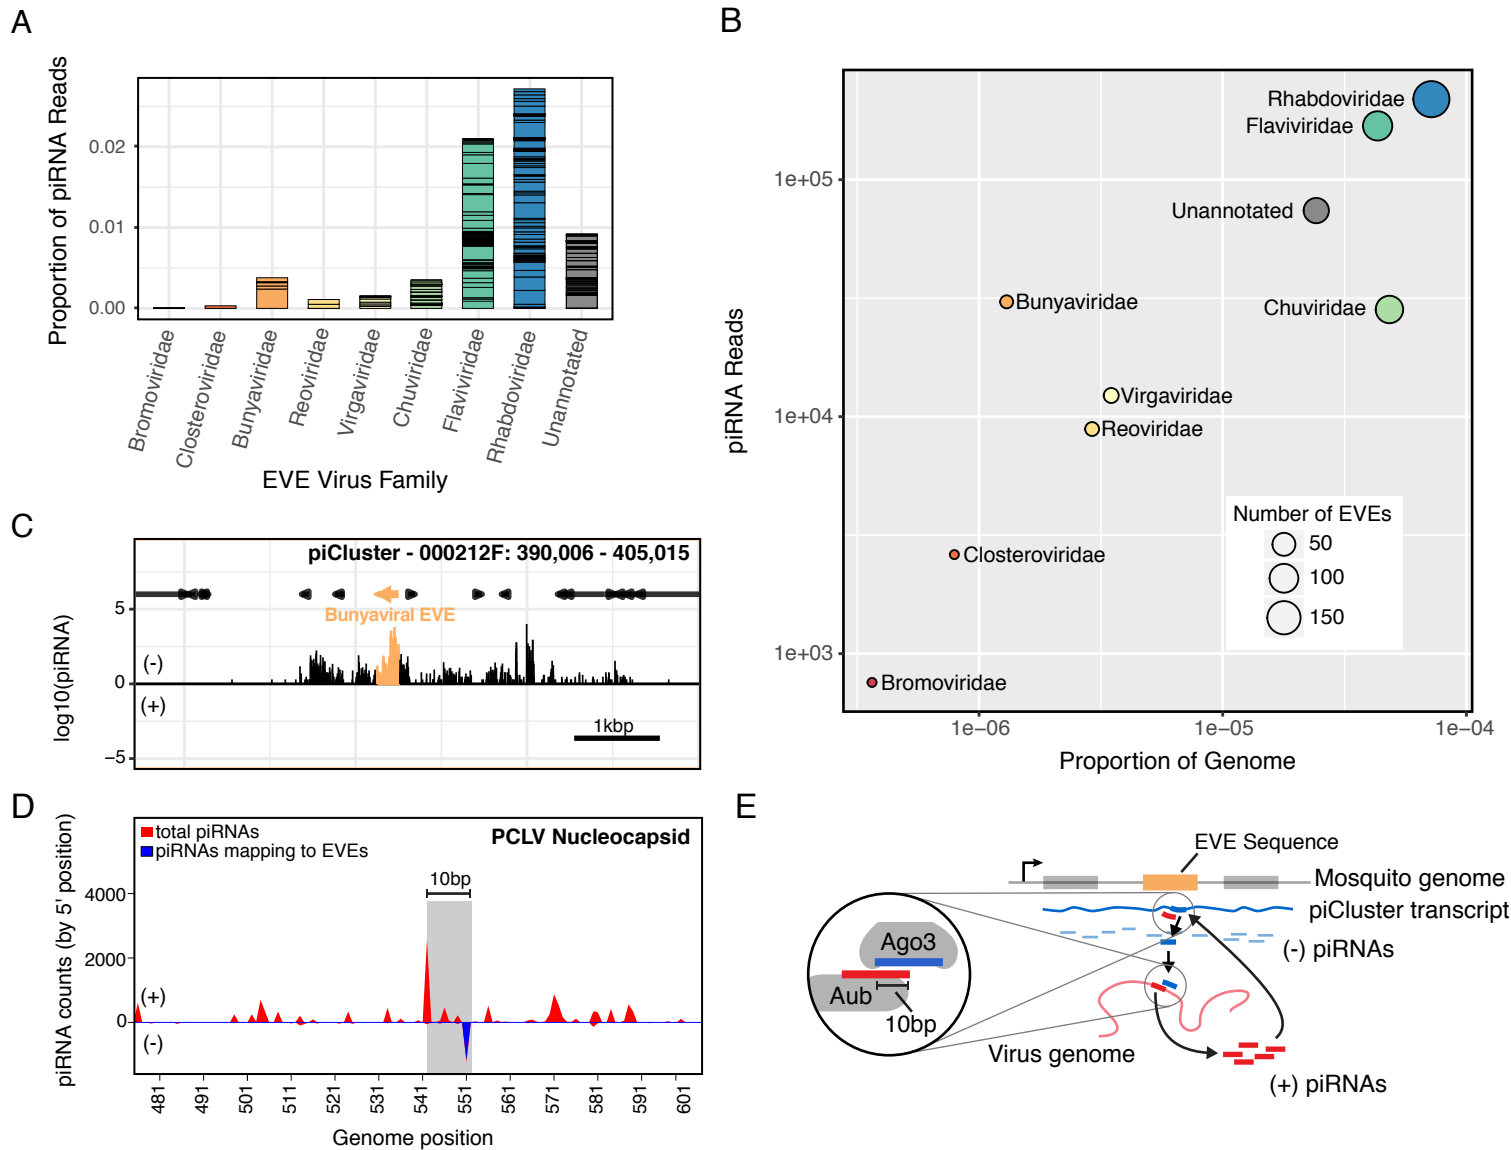

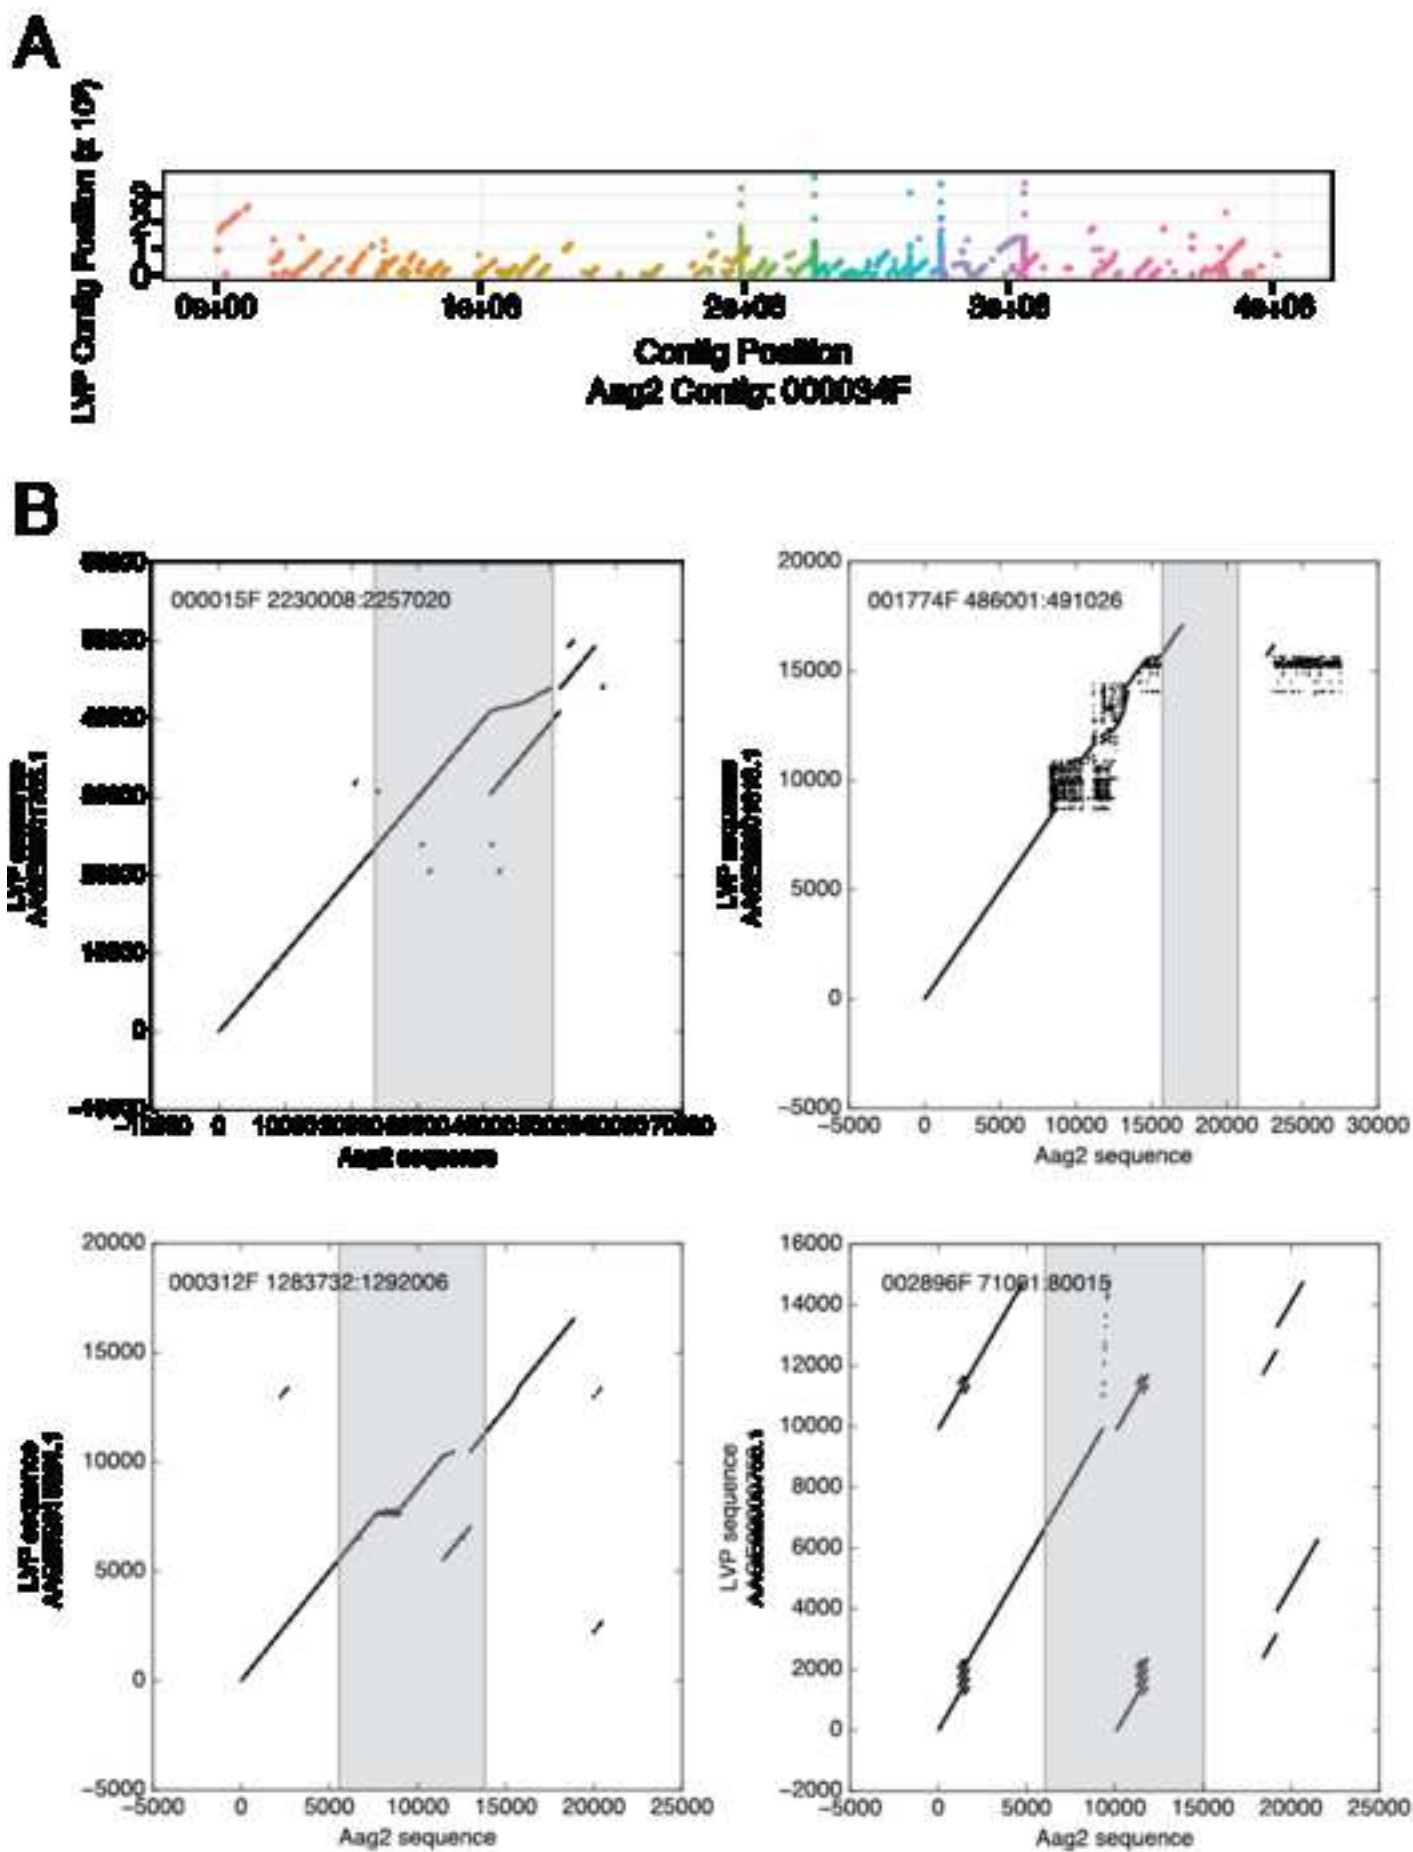

Figure S2  
A

# Overlapping TE/EVE pairs

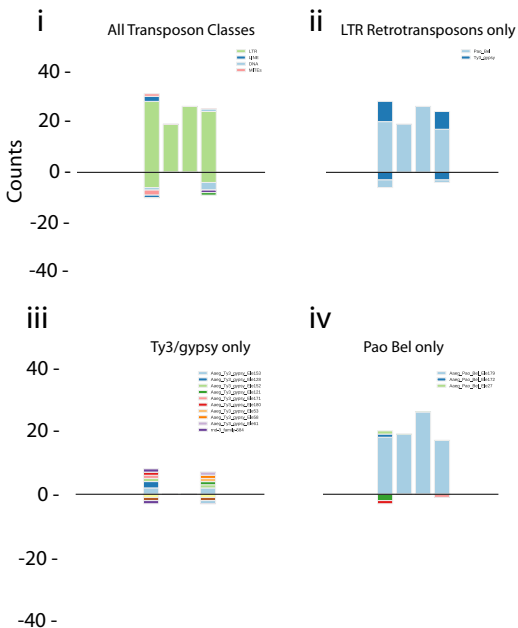

Figure S3

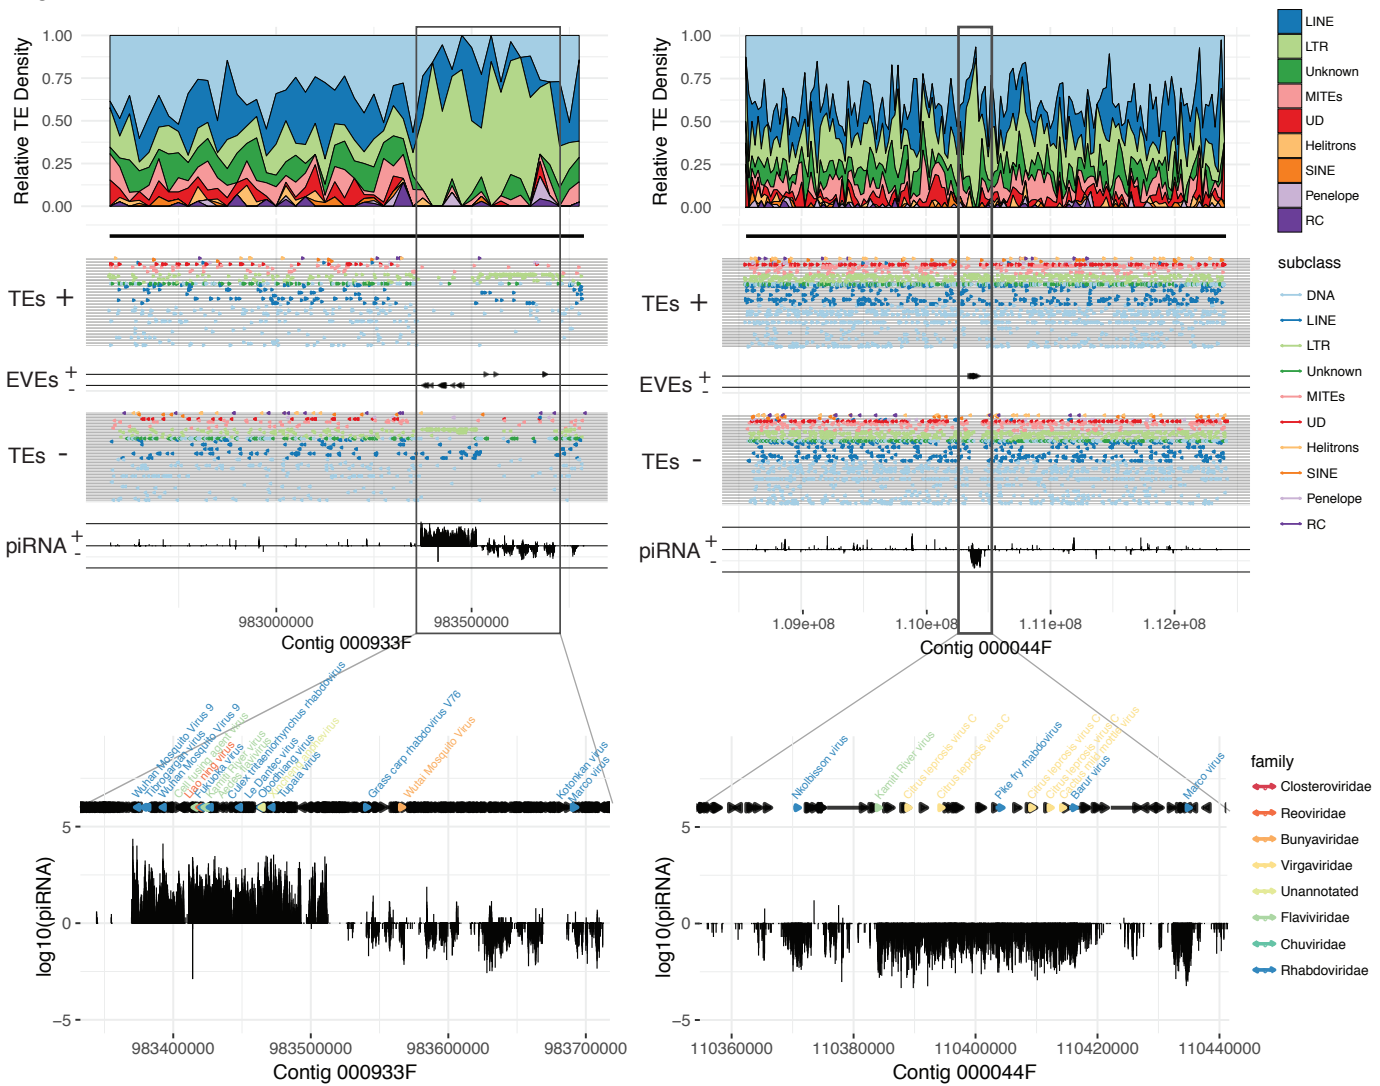

Figure S4

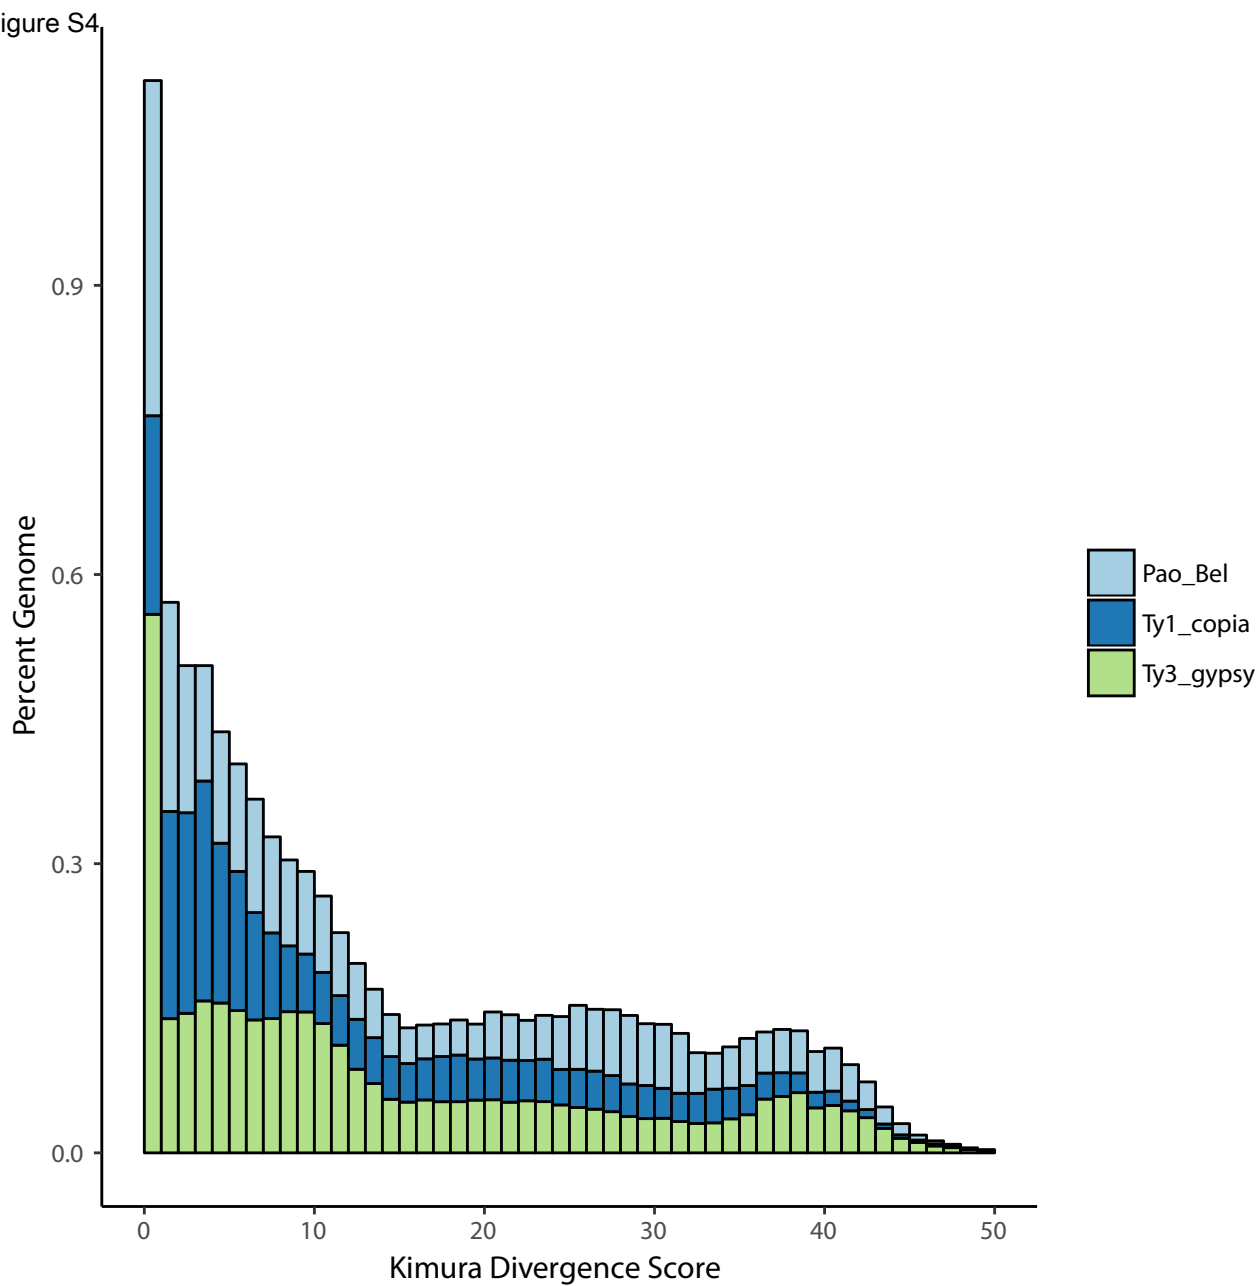

Figure S5

## piRNAs mapping to PCLV\_NC

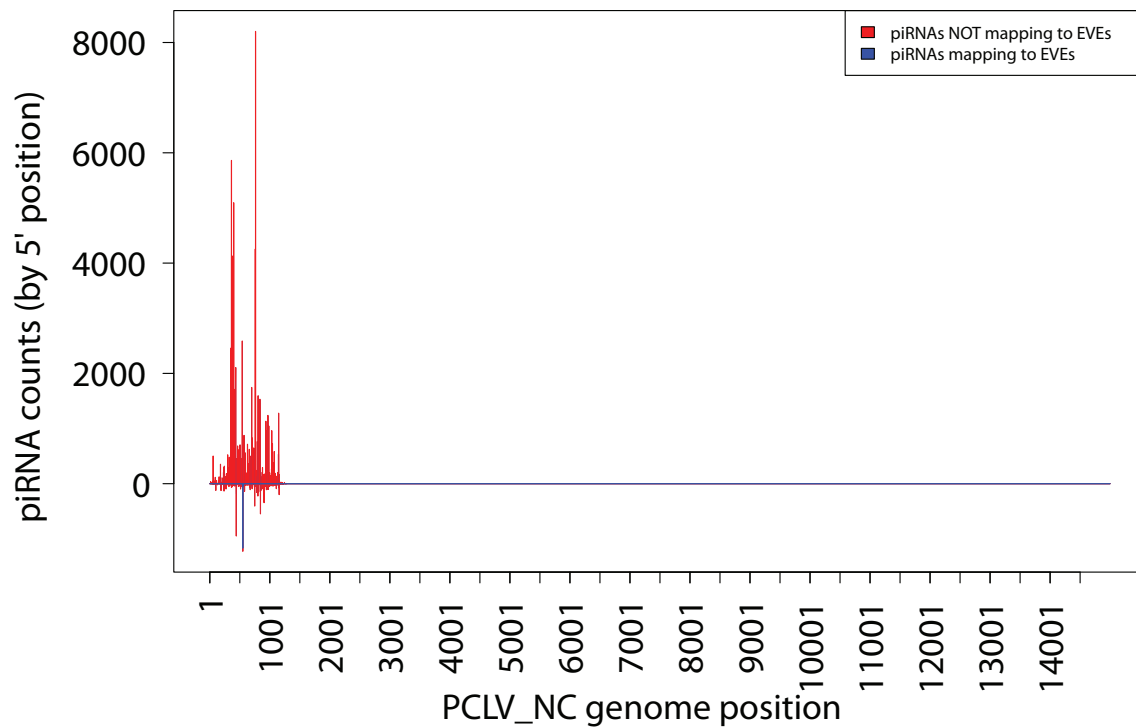

B

## piRNAs mapping to Kamiti River Virus

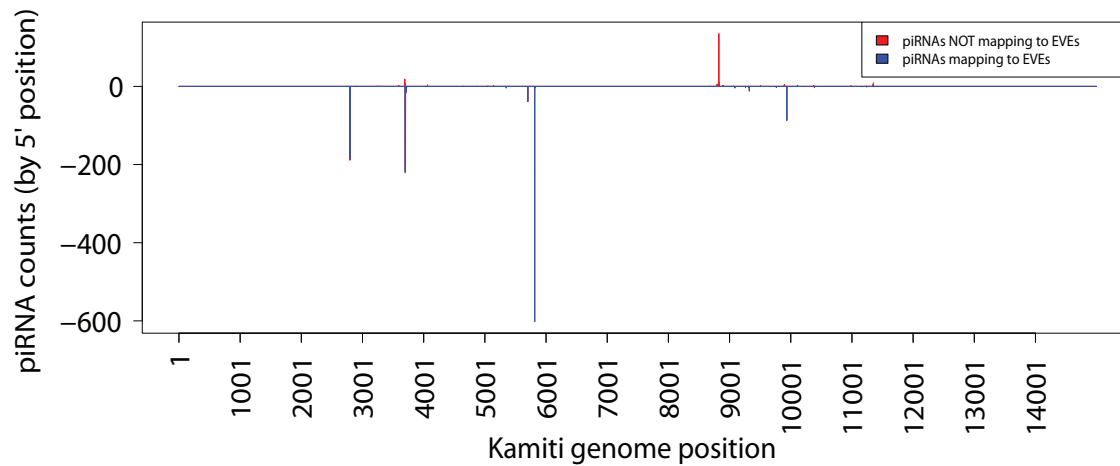



Table 1

UCB

LVP

Aag2

Sample

LVP strain

LVP strain

Aag2 cell line

Seq. Strategy

Illumina

Sanger

PacBio

Released

5/2015

6/2006

NA

Coverage

6.8x

7.6x

~50x

Total sequence length

744,596,036

1,383,957,531

1,723,930,323

Total assembly gap length

196,533,049

73,881,199

0

Num. of contigs

961,292

36,204

3,752

Contig N50

989

82,618

1,420,116

Contig L50

151,087

4,346

368

Table 2

|        | Num. of elements | Length (Mbp) | Percent of genome |
|--------|------------------|--------------|-------------------|
| SINE   | 28,301           | 4.4          | 0.25              |
| LINE   | 558,382          | 259.9        | 15.07             |
| LTR    | 495,204          | 163.9        | 9.51              |
| DNA    | 1,184,522        | 309.0        | 17.93             |
| Other* | 725,958          | 233.7        | 13.55             |
| Total  | 2,992,367        | 970.9        | 56.31             |

\*includes helitrons, MITEs, Penelope, RC, UD, and unknown elements
